# Supplementary material for: Enhancing luminescence properties of lanthanide(iii)/pyrimidine-4,6-dicarboxylato system by solvent-free approach
Source: Royal Society of Chemistry journal article supplement (doi:10.1039/c4dt03797a), 2015-01-01
Supplement: c4dt03797a1.pdf [file c4dt03797a1.pdf]

Supporting Information for

**Enhancing Luminescence Properties of Lanthanide(III)/Pyrimidine-4,6-dicarboxylato System by Solvent-free Approach**

*Javier Cepeda,\*<sup>a</sup> Sonia Pérez-Yáñez,<sup>a</sup> Garikoitz Beobide,<sup>a</sup> Oscar Castillo,\*<sup>a</sup> José Ángel García<sup>b</sup>,  
Mónica Lanchas,<sup>a</sup> and Antonio Luque<sup>a</sup>*

*<sup>a</sup> Departamento de Química Inorgánica and <sup>b</sup> Departamento de Física Aplicada II, Facultad de Ciencia y Tecnología, Universidad del País Vasco, Apartado 644, E-48080 Bilbao, Spain*

- S2–3. Employed reactants and individual yields for all compounds.
- S4–9. Elemental analyses and FT-IR spectroscopy of **1-Ln** and **2-Ln** compounds.
- S10–13. XRPD data and pattern-matching analyses for **1-Ln** and **2-Ln** compounds.
- S14–17. Thermogravimetric data for **1-Ln** and **2-Ln** compounds.
- S18–19. Plots of the thermal dependence of the magnetic susceptibility of **1-Ln–2-Ln** compounds.
- S20–21. Theoretical expressions derived for the fit of the magnetic susceptibility.
- S22–24. Curie-Weiss fit of the  $\chi_M^{-1}$  vs  $T$  curves.
- S25–30. Emission and excitation spectra of **1-Ln–2-Ln** compounds.
- S31–32. Quantum yield determination of **1-Eu**, **2-Tb**, and **1-Eu\_anh**.
- S33. Decay lifetimes at different temperatures for **1-Sm**, **1-Eu**, **2-Tb**, and **2-Dy**.
- S33–35. Optical images and RT micro-PL images of illuminated single crystals.
- S36–39. Experimental emission decay curves for compounds **1-Sm**, **1-Eu**, **2-Tb**, and **2-Dy**.
- S40. Additional structural data and figures.
- S41. Ideal coordination sphere polyhedra.

## Employed reactants and individual yields

**Table S1.** Employed reactants.

| Name                                         | Formula                                              | CS      | AS    | MW<br>(g/mol<br>) | CAS         | R          | S              |
|----------------------------------------------|------------------------------------------------------|---------|-------|-------------------|-------------|------------|----------------|
| Cerium(III)<br>nitrate<br>hexahydrate        | Ce(NO <sub>3</sub> ) <sub>3</sub> ·6H <sub>2</sub> O | Aldrich | ≥99%  | 434.22            | 10294-41-4  | 8-41       | 17-26-39       |
| Dysprosium(III)<br>nitrate hydrate           | Dy(NO <sub>3</sub> ) <sub>3</sub> ·xH <sub>2</sub> O | Aldrich | ≥99%  | 348.51            | 100641-13-2 | 8-36/37/38 | 17-26-36/37/39 |
| Europium(III)<br>nitrate<br>pentahydrate     | Eu(NO <sub>3</sub> ) <sub>3</sub> ·5H <sub>2</sub> O | Aldrich | ≥99%  | 428.06            | 63026-01-7  | 8-36/37/38 | 17-26-36/37/39 |
| Erbium(III)<br>nitrate<br>pentahydrate       | Er(NO <sub>3</sub> ) <sub>3</sub> ·5H <sub>2</sub> O | Aldrich | ≥99%  | 443.35            | 10031-51-3  | 8-37/38-41 | 17-26-36/39    |
| Gadolinium(III)<br>nitrate<br>hexahydrate    | Gd(NO <sub>3</sub> ) <sub>3</sub> ·6H <sub>2</sub> O | Aldrich | ≥99%  | 451.36            | 19598-90-4  | 8-36/37/38 | 17-26-36/37/39 |
| Holmium(III)<br>nitrate<br>pentahydrate      | Ho(NO <sub>3</sub> ) <sub>3</sub> ·5H <sub>2</sub> O | Aldrich | ≥99%  | 441.02            | 14483-18-2  | 8-36/37/38 | 17-26-36/37/39 |
| Lanthanum(III)<br>nitrate<br>hexahydrate     | La(NO <sub>3</sub> ) <sub>3</sub> ·6H <sub>2</sub> O | Aldrich | ≥99%  | 433.01            | 10277-43-7  | 8-36/37/38 | 17-26-36       |
| Lutetium(III)<br>nitrate hydrate             | Lu(NO <sub>3</sub> ) <sub>3</sub> ·xH <sub>2</sub> O | Aldrich | 99.9% | 360.98            | 100641-16-5 | 8-36/37/38 | 17-26-36       |
| Neodymium(III)<br>) nitrate<br>hexahydrate   | Nd(NO <sub>3</sub> ) <sub>3</sub> ·6H <sub>2</sub> O | Aldrich | 99.9% | 438.35            | 16454-60-7  | 8-36/37/38 | 17-26-36/37/39 |
| Praseodymium(<br>III) nitrate<br>hexahydrate | Pr(NO <sub>3</sub> ) <sub>3</sub> ·6H <sub>2</sub> O | Aldrich | 99.9% | 435.01            | 15878-77-0  | 8-36/37/38 | 17-26-36/37/39 |
| Samarium(III)<br>nitrate<br>hexahydrate      | Sm(NO <sub>3</sub> ) <sub>3</sub> ·6H <sub>2</sub> O | Aldrich | 99.9% | 444.47            | 13759-83-6  | 8-36/37/38 | 17-26-36/37/39 |
| Terbium(III)<br>nitrate<br>hexahydrate       | Tb(NO <sub>3</sub> ) <sub>3</sub> ·6H <sub>2</sub> O | Aldrich | 99.9% | 453.03            | 13451-19-9  | 8-36/37/38 | 17-26-36/37/39 |
| Thulium(III)<br>nitrate<br>hexahydrate       | Tm(NO <sub>3</sub> ) <sub>3</sub> ·5H <sub>2</sub> O | Aldrich | 99.9% | 445.03            | 36548-87-5  | 8-36/37/38 | 17-26-36/37/39 |
| Ytterbium(III)<br>nitrate<br>hexahydrate     | Yb(NO <sub>3</sub> ) <sub>3</sub> ·5H <sub>2</sub> O | Aldrich | 99.9% | 449.13            | 35725-34-9  | 8-36/37/38 | 17-26-36       |

**Table S2.** Yields for all the **1-Ln** compounds.

| <b>Compound</b>  | <b>1-La</b> | <b>1-Ce</b> | <b>1-Pr</b> | <b>1-Nd</b> | <b>1-Sm</b> | <b>1-Eu</b> |
|------------------|-------------|-------------|-------------|-------------|-------------|-------------|
| <b>Yield (%)</b> | 91.4        | 94.8        | 92.3        | 91.6        | 90.9        | 93.3        |

**Table S3.** Yields for all the **2-Ln** compounds.

| <b>Compound</b>  | <b>2-Gd</b> | <b>2-Tb</b> | <b>2-Dy</b> | <b>2-Ho</b> | <b>2-Er</b> | <b>2-Tm</b> | <b>2-Yb</b> | <b>2-Lu</b> |
|------------------|-------------|-------------|-------------|-------------|-------------|-------------|-------------|-------------|
| <b>Yield (%)</b> | 94.4        | 93.9        | 94.1        | 91.6        | 91.3        | 93.8        | 94.5        | 92.8        |

**Table S4.** Elemental analyses of **1-Ln** and **2-Ln** compounds.

| <i>Compound</i>                                               | <b>C (%)</b> |             | <b>H (%)</b> |             | <b>N (%)</b> |             | <b>Ln (%)</b> |             |
|---------------------------------------------------------------|--------------|-------------|--------------|-------------|--------------|-------------|---------------|-------------|
|                                                               | <i>Exp.</i>  | <i>Cal.</i> | <i>Exp.</i>  | <i>Cal.</i> | <i>Exp.</i>  | <i>Cal.</i> | <i>Exp.</i>   | <i>Cal.</i> |
| <b>C<sub>6</sub>H<sub>4</sub>LnN<sub>3</sub>O<sub>8</sub></b> |              |             |              |             |              |             |               |             |
| 1-La                                                          | 18.92        | 18.72       | 1.16         | 1.05        | 10.78        | 10.91       | 35.95         | 36.08       |
| 1-Ce                                                          | 18.52        | 18.66       | 1.28         | 1.04        | 10.73        | 10.88       | 36.14         | 36.28       |
| 1-Pr                                                          | 18.55        | 18.62       | 1.19         | 1.04        | 10.90        | 10.86       | 36.28         | 36.41       |
| 1-Nd                                                          | 18.29        | 18.46       | 1.32         | 1.03        | 10.62        | 10.76       | 37.11         | 36.95       |
| 1-Sm                                                          | 18.34        | 18.18       | 0.88         | 1.02        | 10.76        | 10.60       | 37.86         | 37.93       |
| 1-Eu                                                          | 17.93        | 18.10       | 1.22         | 1.01        | 10.73        | 10.56       | 38.31         | 38.17       |
| <b>C<sub>6</sub>H<sub>6</sub>LnN<sub>3</sub>O<sub>9</sub></b> |              |             |              |             |              |             |               |             |
| 2-Gd                                                          | 16.88        | 17.10       | 1.55         | 1.44        | 9.87         | 9.97        | 37.43         | 37.32       |
| 2-Tb                                                          | 16.93        | 17.03       | 1.54         | 1.43        | 9.98         | 9.93        | 37.71         | 37.57       |
| 2-Dy                                                          | 17.02        | 16.89       | 1.56         | 1.42        | 9.69         | 9.85        | 38.17         | 38.09       |
| 2-Ho                                                          | 16.67        | 16.80       | 1.34         | 1.41        | 9.89         | 9.79        | 38.46         | 38.44       |
| 2-Er                                                          | 16.93        | 16.71       | 1.45         | 1.40        | 9.65         | 9.74        | 38.86         | 38.77       |
| 2-Tm                                                          | 16.51        | 16.64       | 1.28         | 1.40        | 9.87         | 9.70        | 38.89         | 39.01       |
| 2-Yb                                                          | 16.69        | 16.48       | 1.52         | 1.38        | 9.55         | 9.61        | 39.37         | 39.58       |
| 2-Lu                                                          | 16.25        | 16.41       | 1.20         | 1.38        | 9.73         | 9.57        | 39.90         | 39.85       |

## FTIR analysis

All spectra exhibit a broad and intense band around  $3530\text{ cm}^{-1}$  that corresponds to the vibration of the O–H bond of free water, followed by weak bands between  $3215$  and  $3085\text{ cm}^{-1}$  corresponding to the C–H vibrations of the pyrimidinic ring of the pmdc. The intense vibrations in the  $1670$ – $1520\text{ cm}^{-1}$  region are attributed to both the asymmetric stretching vibrations of the carboxylate groups and the aromatic C–C and C–N bonds, while the symmetric stretching vibrations of the carboxylate groups appear in the lower range of  $1405$ – $1285\text{ cm}^{-1}$ . The main difference between spectra of **1-Ln** and **2-Ln** is that most of the bands involving vibrations of carboxylate groups and the pyrimidine ring are shifted towards lower wavenumbers for the **1-Ln** family, which could be attributed to the different coordination mode of pmdc. Vibrations corresponding to the nitrate anions are also distinguished within the last frequency region. In good agreement to the results obtained by Gatehouse et al.,<sup>1</sup> the bidentate coordination mode of the nitrate anion is ensured by the presence of three bands at  $1476$ ,  $1290$ , and  $1025\text{ cm}^{-1}$  with a separation between the two highest-frequency bands of  $186\text{ cm}^{-1}$ . These latter bands are present in all spectra although they partially overlap those of pmdc ligand. Moreover, there is no evidence of free nitrate anions in the sample (coming from unreacted lanthanide(III) nitrates) due to the lack of the  $1383\text{ cm}^{-1}$  band. At lower frequencies, the remaining bands are attributed to the distortions originated in the aromatic ring and the carboxylate groups of the pmdc ligand. The vibration bands of the M–O and M–N bonds are observed below  $530\text{ cm}^{-1}$ .

- (1) (a) Gatehouse, B. M.; Livinstone, S. E.; Nyholm, R. S. *J. Chem. Soc.* **1957**, 4222. (b) Gatehouse, B. M.; Livinstone, S. E.; Nyholm, R. S. *J. Inorg. Nucl. Chem.* **1958**, 8, 75. (c) Nakamoto, K. *Infrared spectra of inorganic and coordination compounds*; John Wiley & Sons, **1997**.

**Table S5.** Observed bands ( $\text{cm}^{-1}$ ) for selected compounds of the isostructural **1-Ln** and **2-Ln** series.<sup>[a]</sup>

| <i>Assignment<sup>bj</sup></i>                    | <i>1-La</i>                                    | <i>2-Gd</i>                                    |
|---------------------------------------------------|------------------------------------------------|------------------------------------------------|
| $\nu$ (O–H)                                       | 3530m, 3410m                                   | 3530m, 3470m                                   |
| $\nu$ (C–H)                                       | 3215m, 3115m, 3085m                            | 3190m, 3135m                                   |
| $\nu_{\text{as}}(\text{O–C–O}) + \nu$ (C=C + C=N) | 1640vs, 1625vs, 1615vs, 1610s,<br>1550s, 1520w | 1670vs, 1655vs, 1640vs, 1600s,<br>1550s, 1520s |
| $\nu$ (C <sub>ar</sub> –C)                        | 1475m, 1445m                                   | 1500s, 1485m, 1445m                            |
| $\nu_{\text{s}}$ (O–C–O)                          | 1390vs, 1325sh, 1315s, 1285w                   | 1405vs, 1315m, 1290s                           |
| $\nu$ (NO <sub>3</sub> )                          | 1475m, 1285w, 1020m                            | 1485w, 1290s, 1030m                            |
| $\delta_{\text{ip}}(\text{C–H})$                  | 1210w, 1195m, 1110m, 1035m,<br>1020m           | 1275s, 1195m, 1095m, 1030m,<br>1005w, 995w     |
| $\delta_{\text{op}}(\text{C–H})$                  | 960m, 950m, 920m                               | 960w, 915w                                     |
| $\delta_{\text{ring}}$                            | 855m                                           | 855m                                           |
| $\delta_{\text{ip}}(\text{O–C–O})$                | 820m, 745s                                     | 810m, 740m                                     |
| $\delta_{\text{op}}(\text{O–C–O})$                | 720m, 700m, 670w                               | 725m, 720m, 705m, 615s                         |
| $\tau_{\text{ring}}$                              | 590w                                           | 585m, 530m                                     |
| $\nu$ (M–O + M–N)                                 | 520m, 490w, 470w                               | 460w                                           |

[a] vs: very strong, s: strong, m: medium, w: weak, sh: shoulder. [b]  $\nu$ : stretching,  $\delta$ : bending, ip: in plane, op: out of plane, s: symmetric, as: asymmetric.

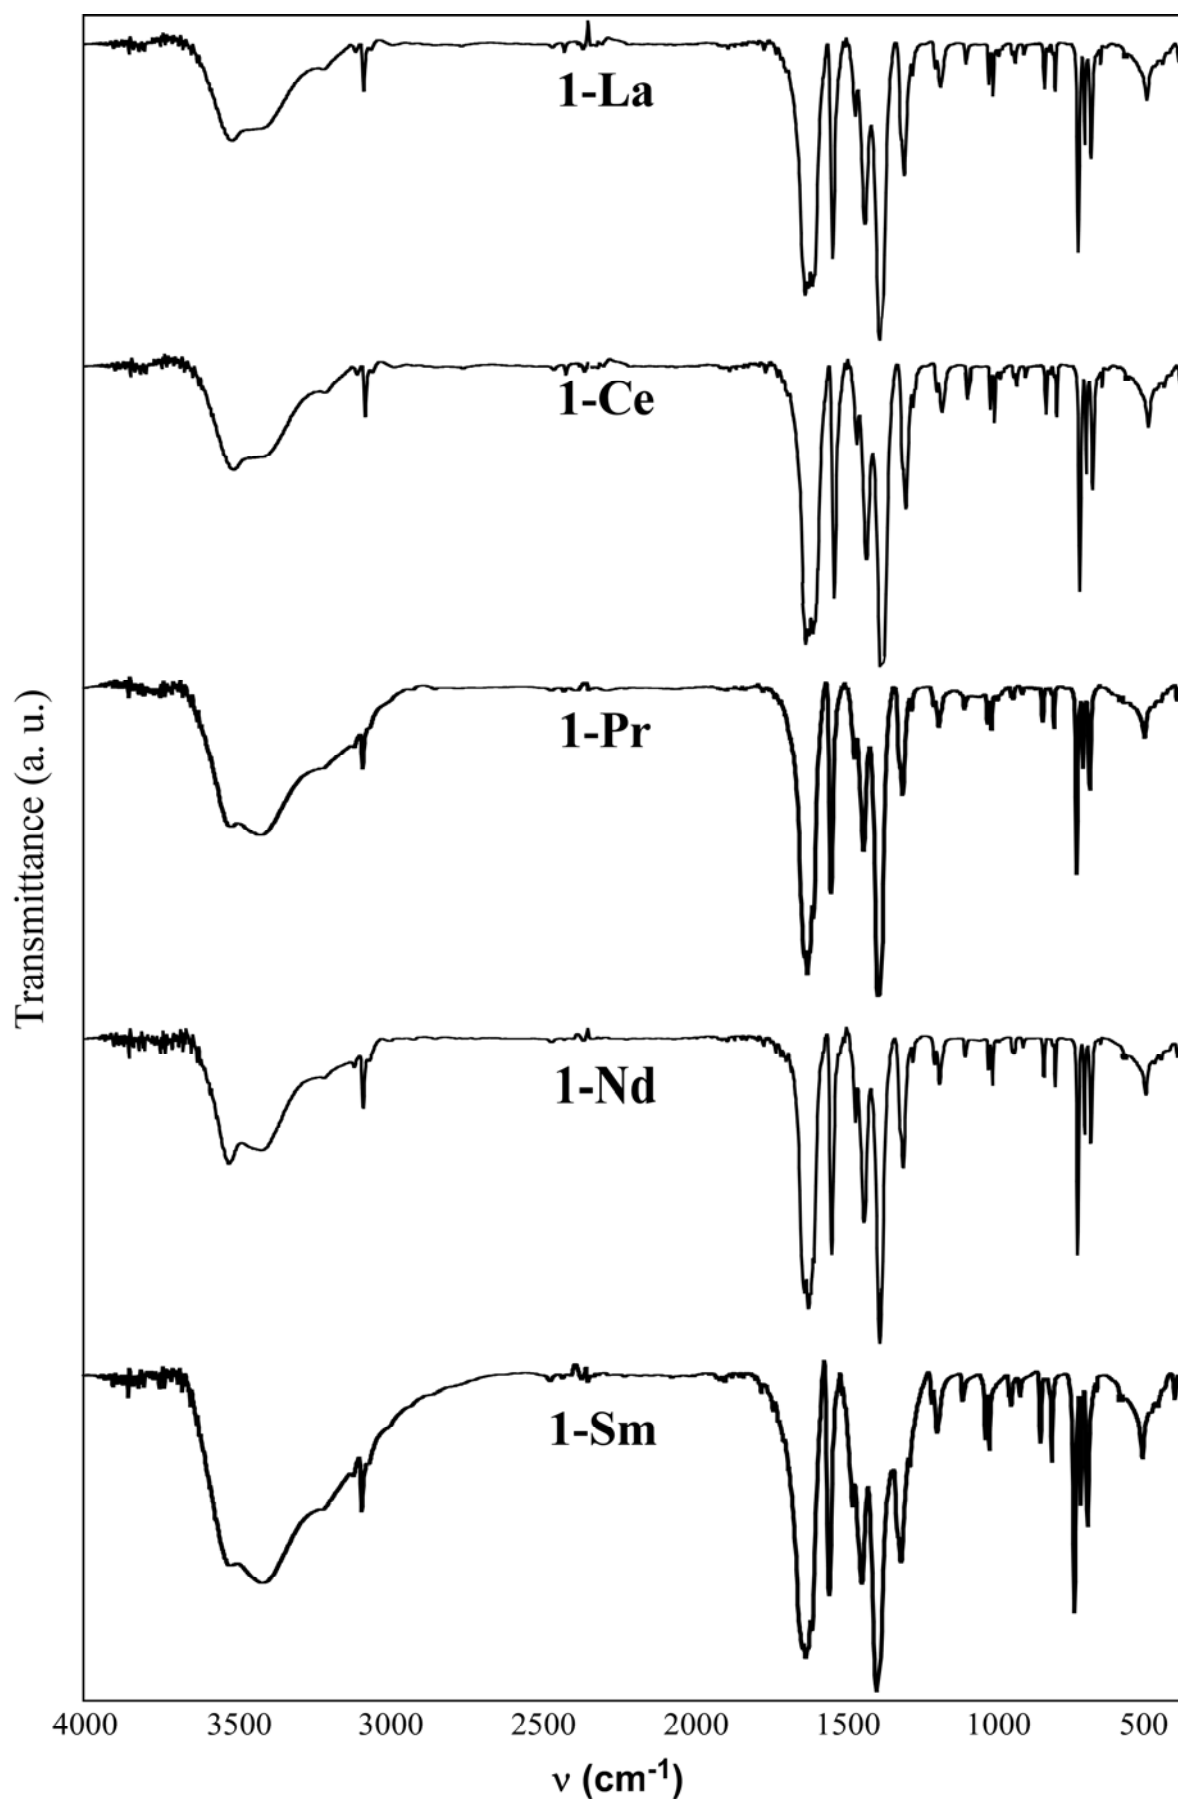

**Figure S1.** FTIR spectra of some **1-Ln** compounds.

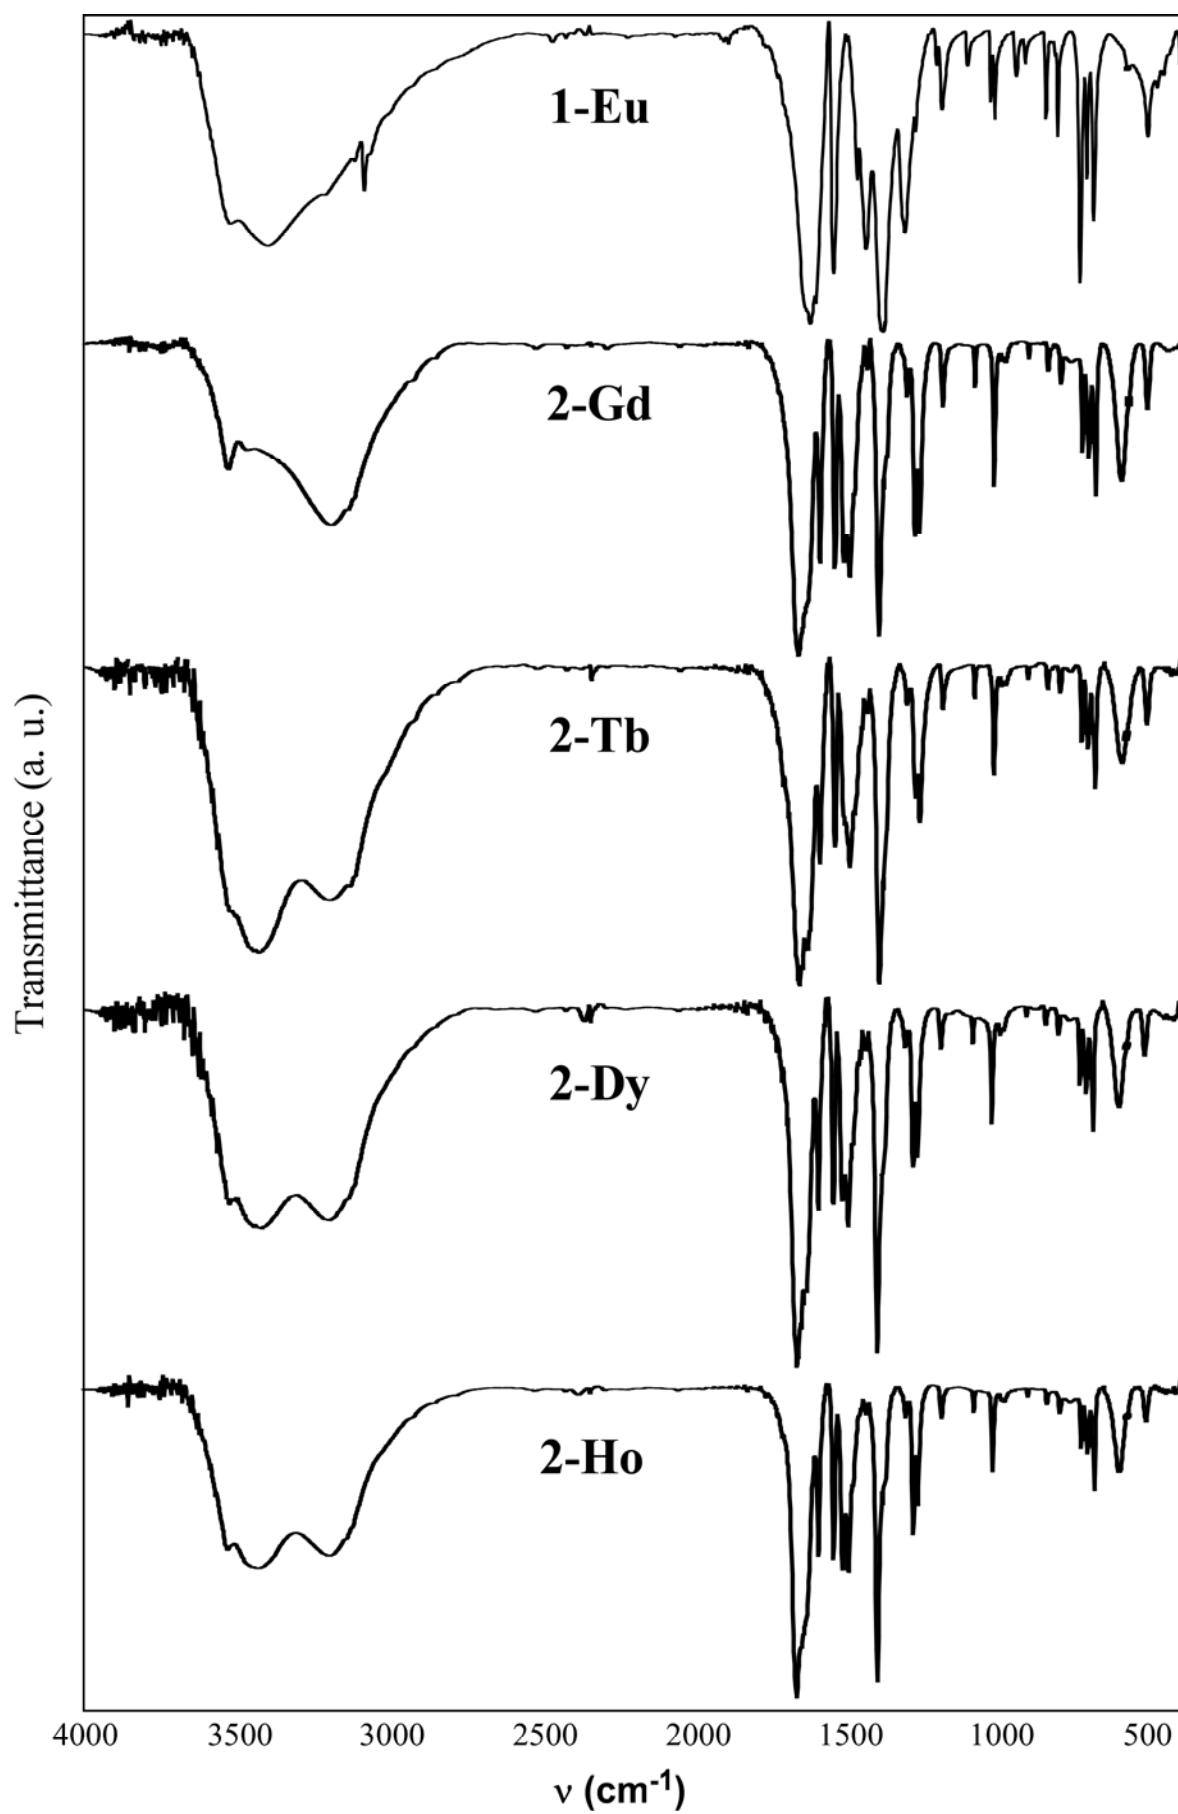

**Figure S2.** FTIR spectra of some 1-Ln and 2-Ln compounds.



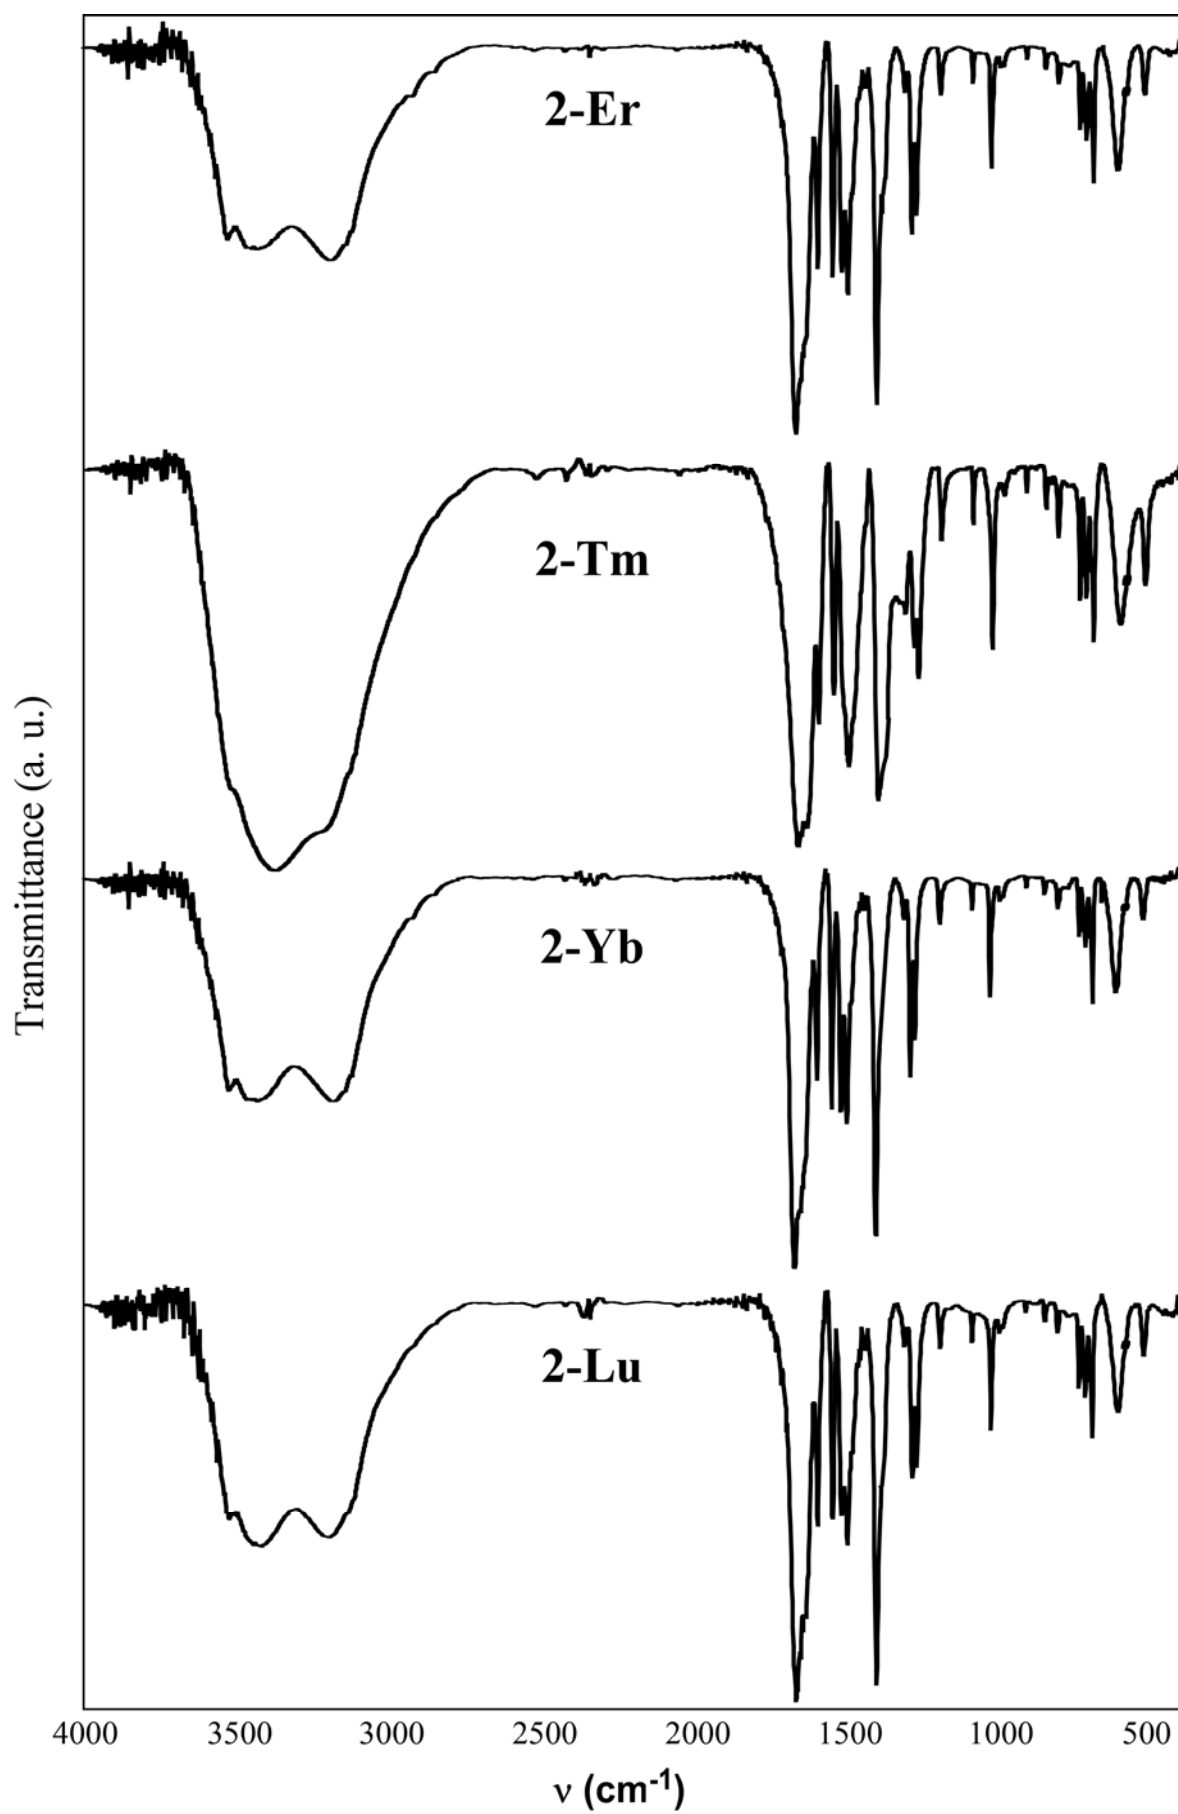

**Figure S3.** FTIR spectra of the remaining **2-Ln** compounds.

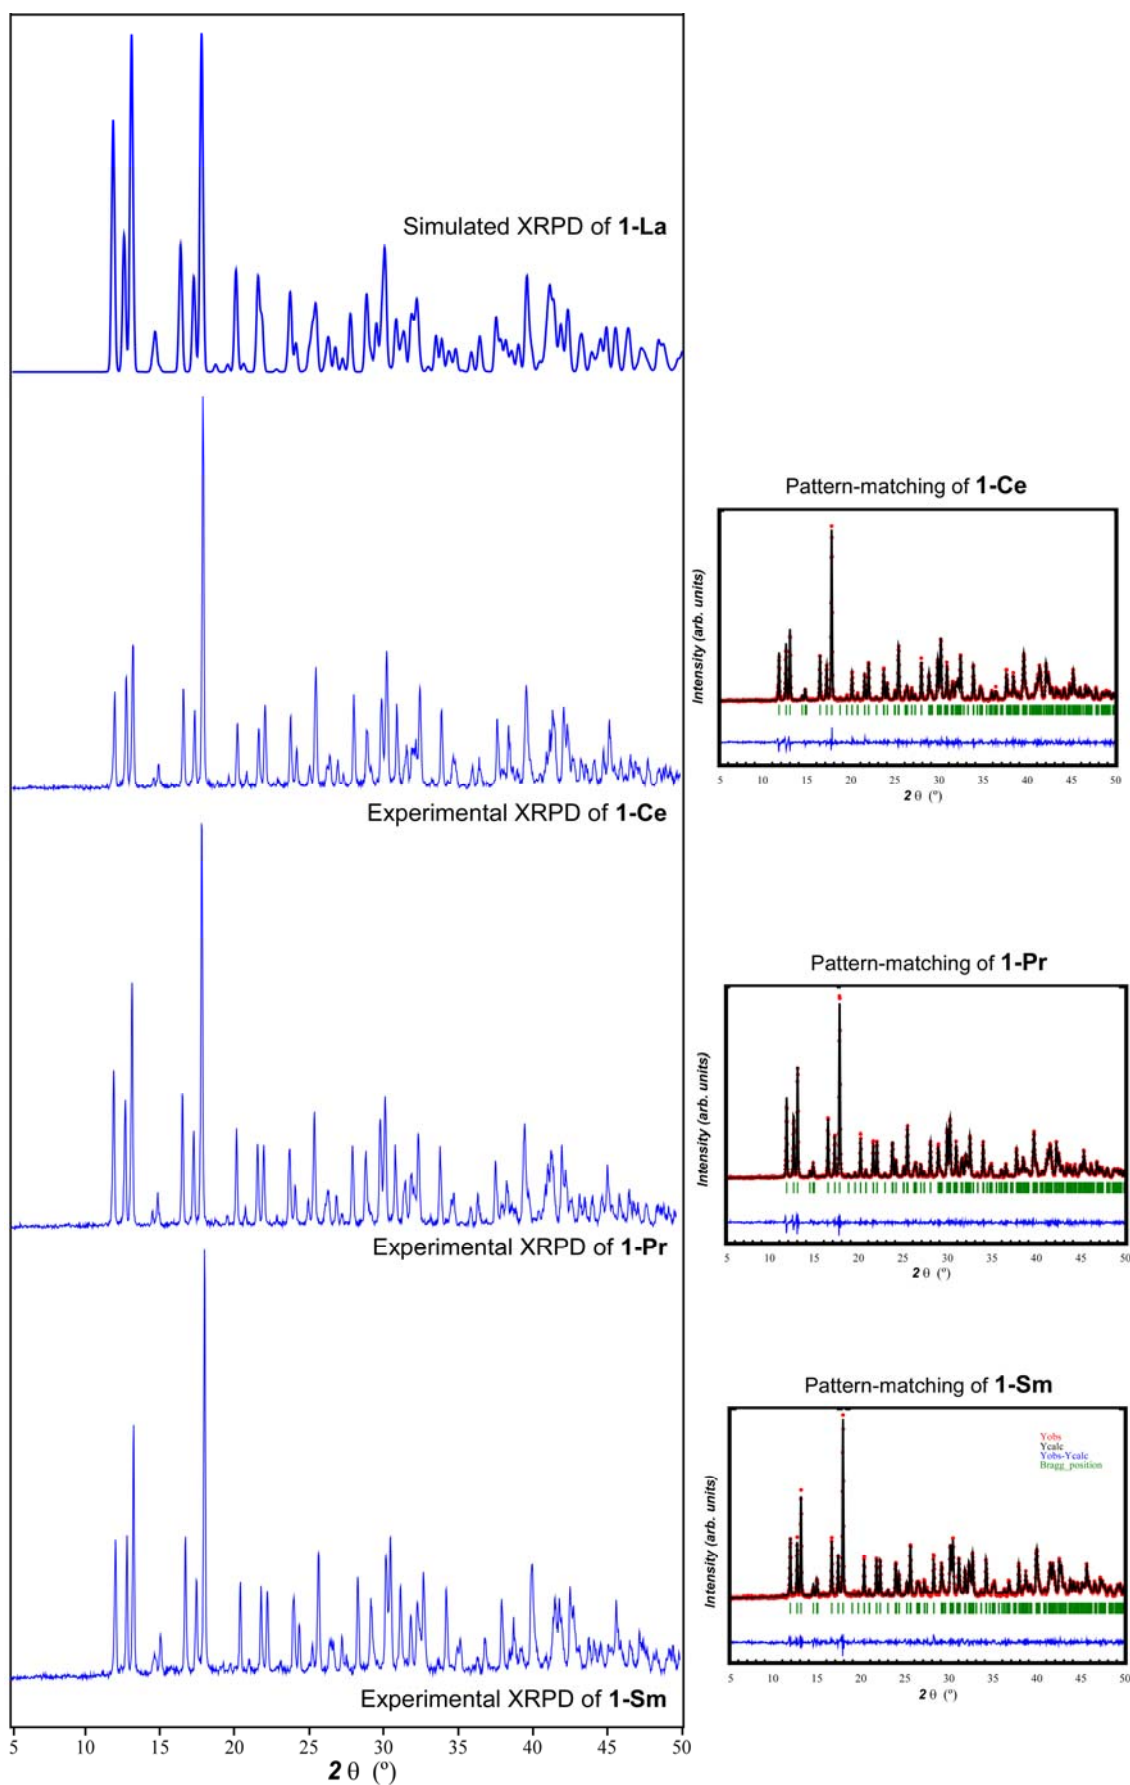

**Figure S4.** Pattern-matching analyses and experimental XRPD of 1-Ln compounds.

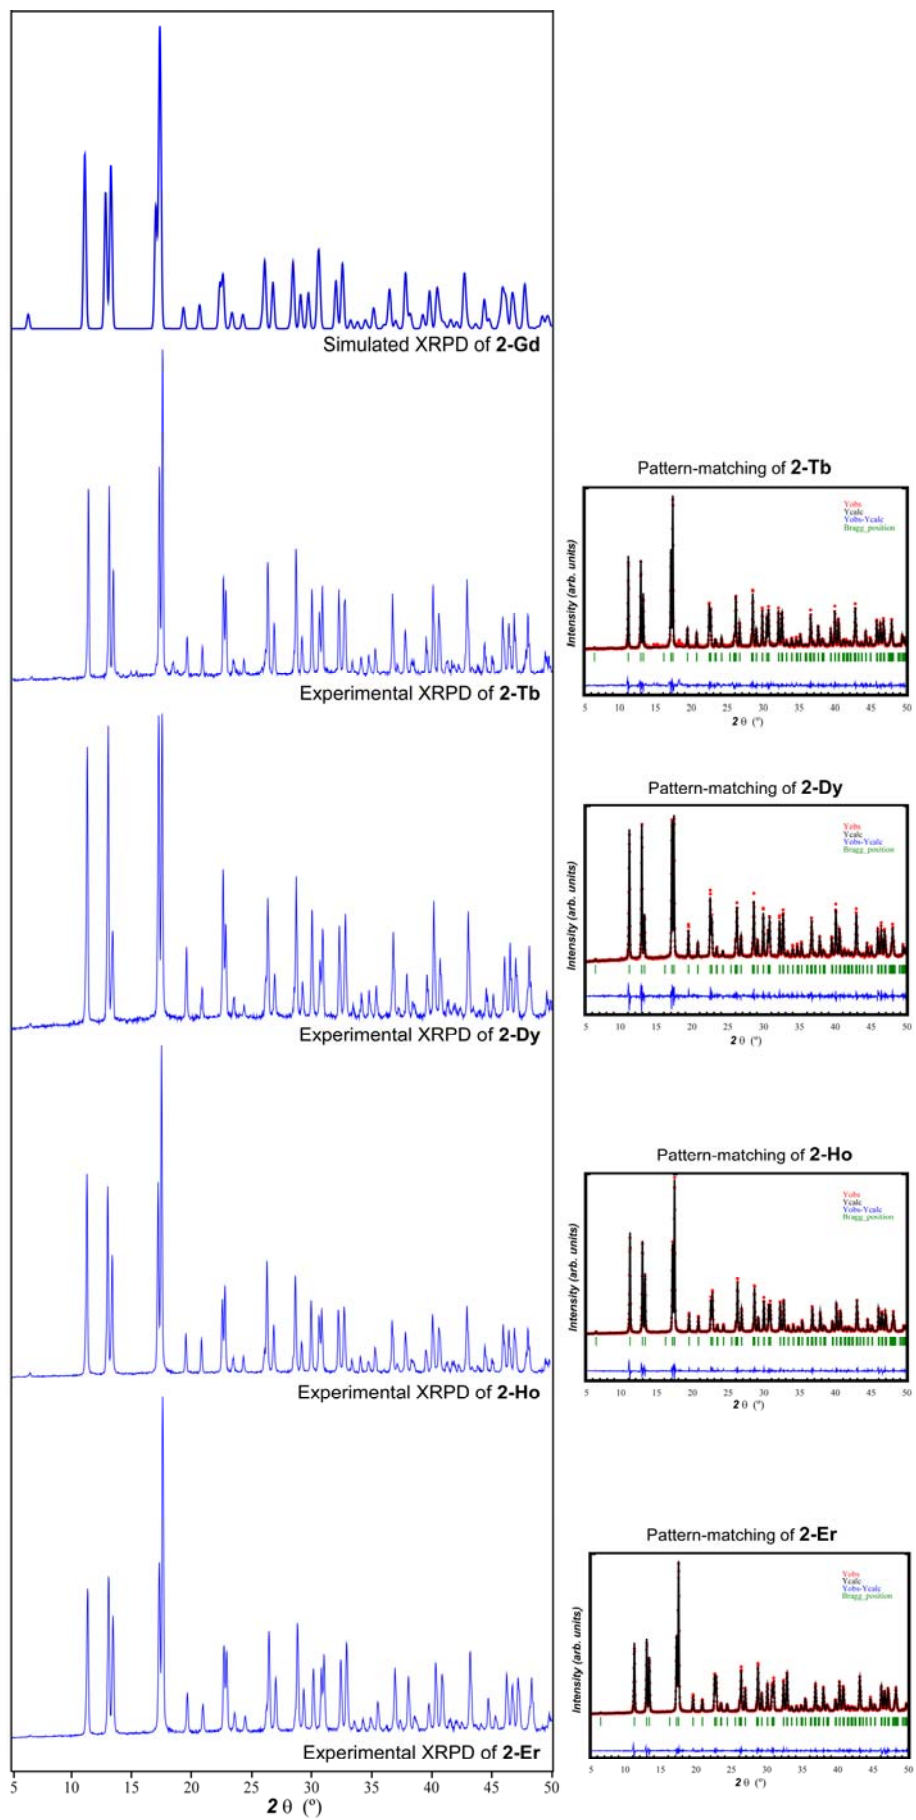

**Figure S5.** Pattern-matching analyses and experimental XRPD of some 2-Ln compounds.

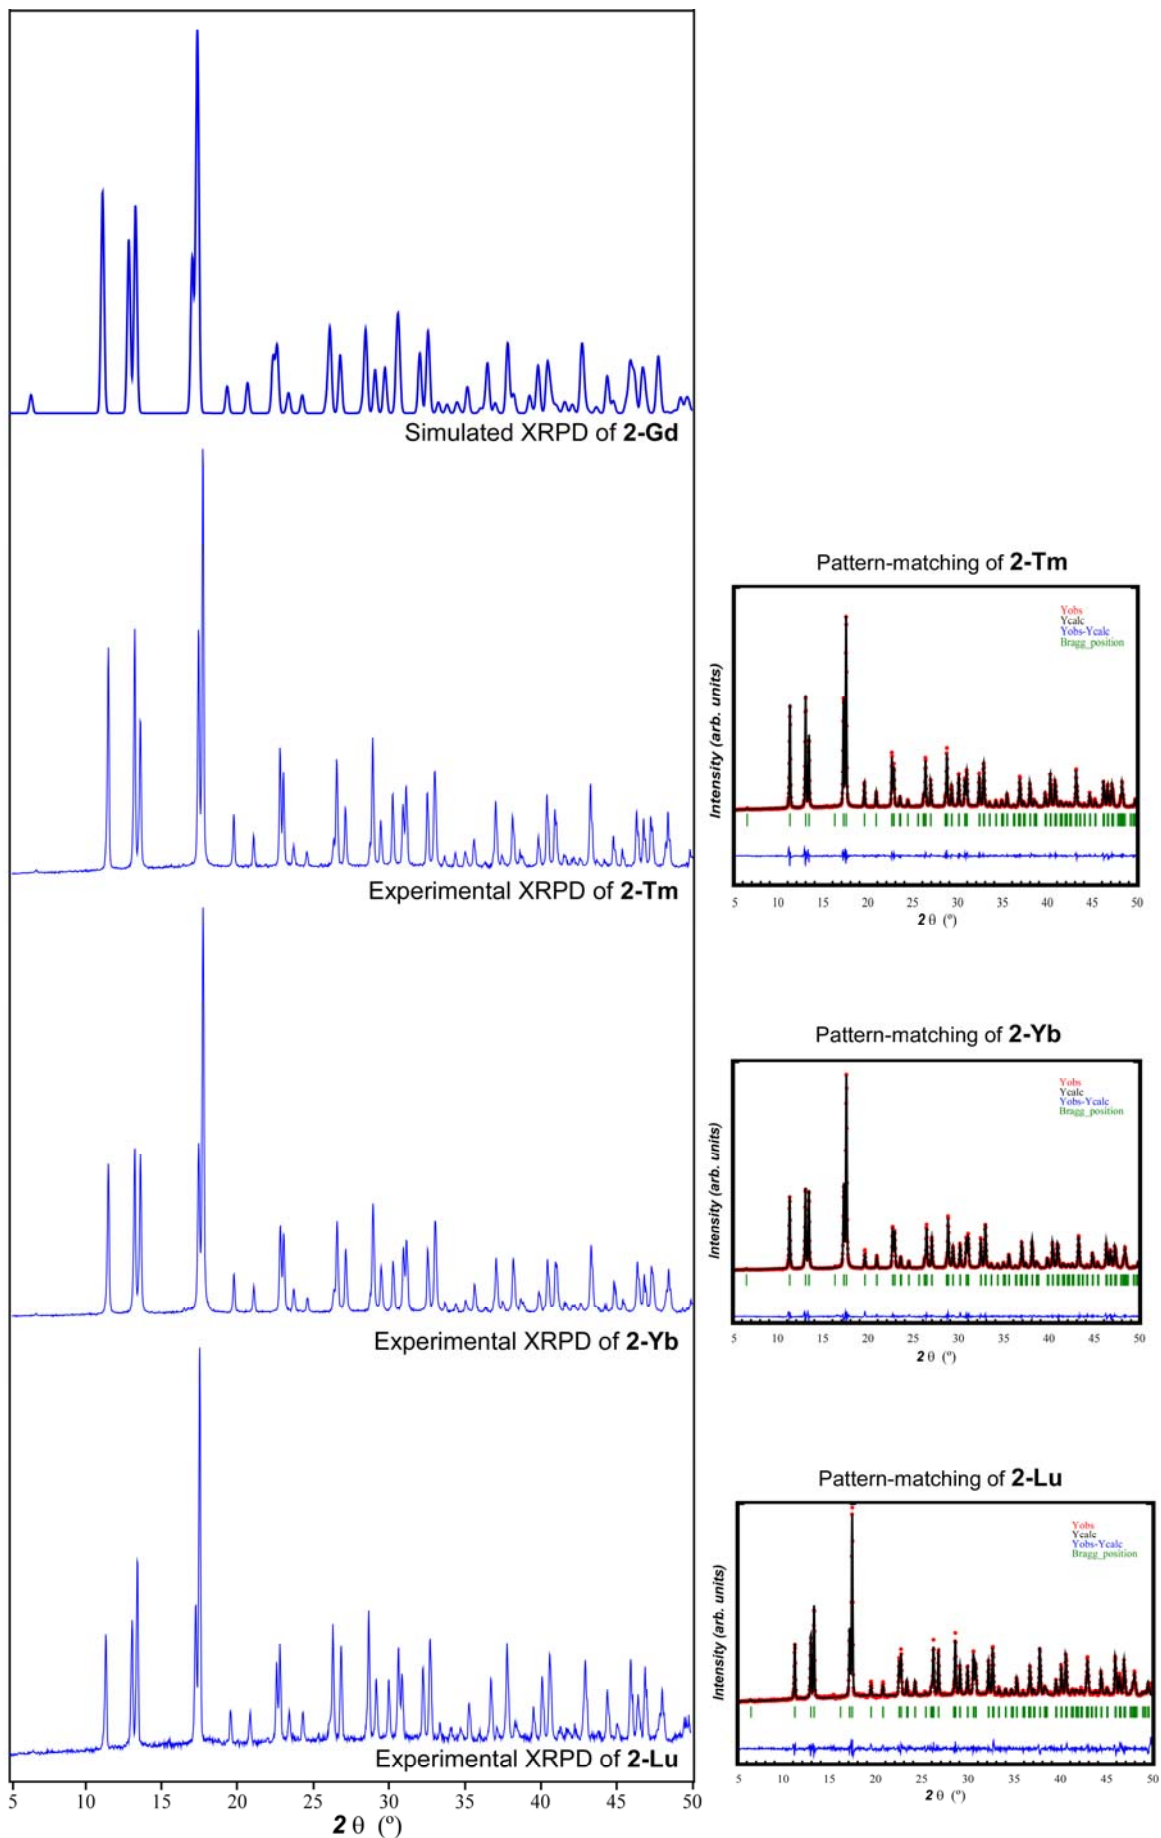

**Figure S6.** Pattern-matching analyses and experimental XRPD of **2-Ln** compounds (cont.).

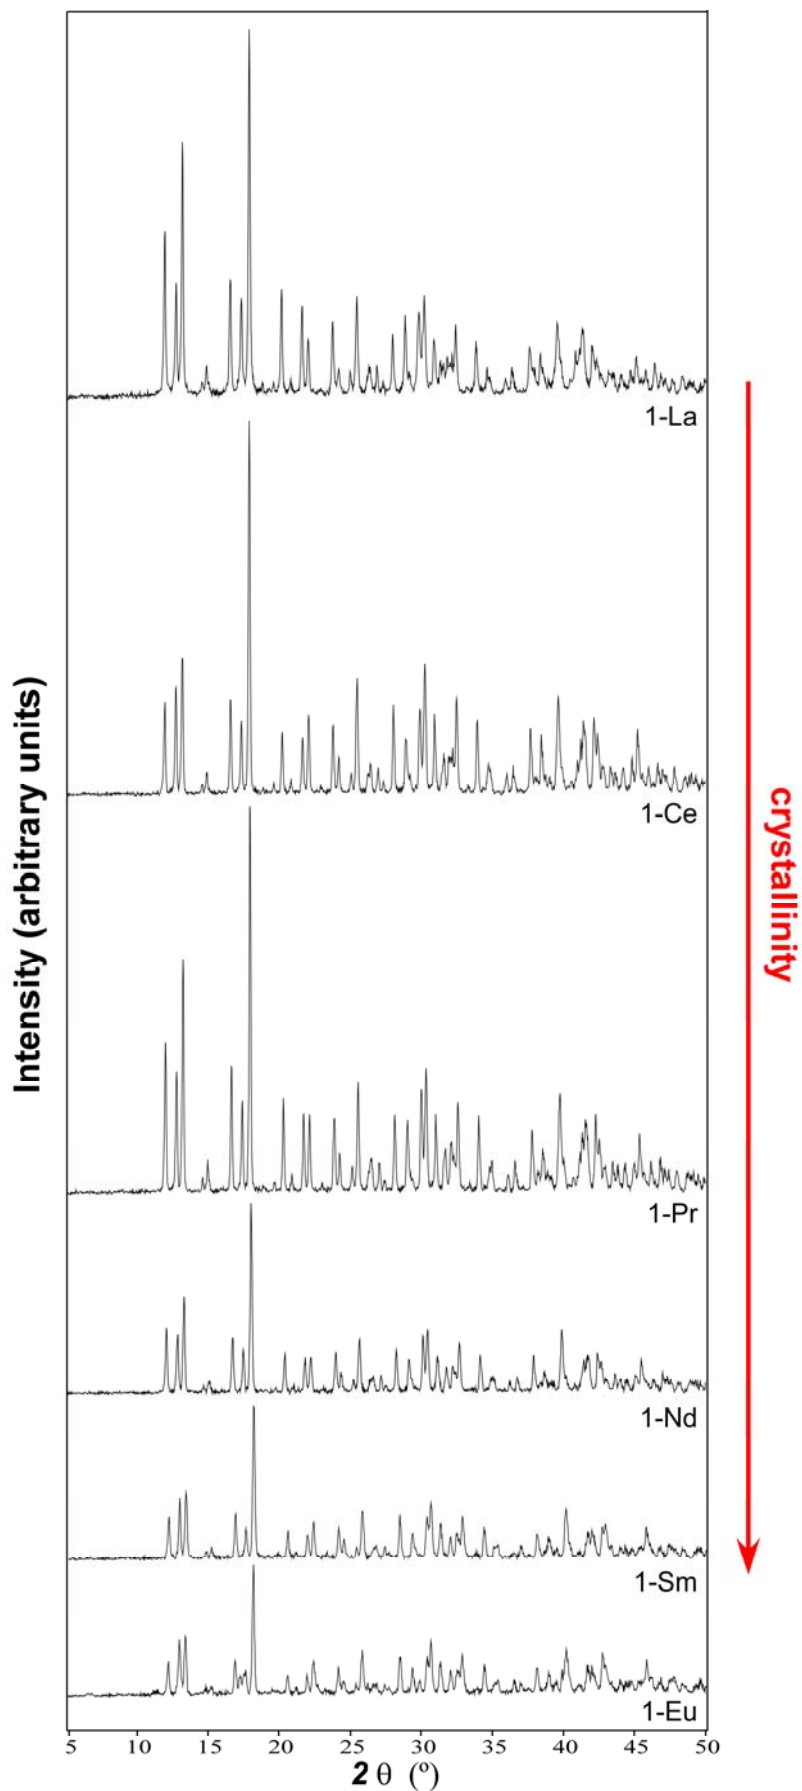

**Figure S7.** Decrease in the crystallinity observed for XRPD patterns of compounds synthesised at 140 °C.

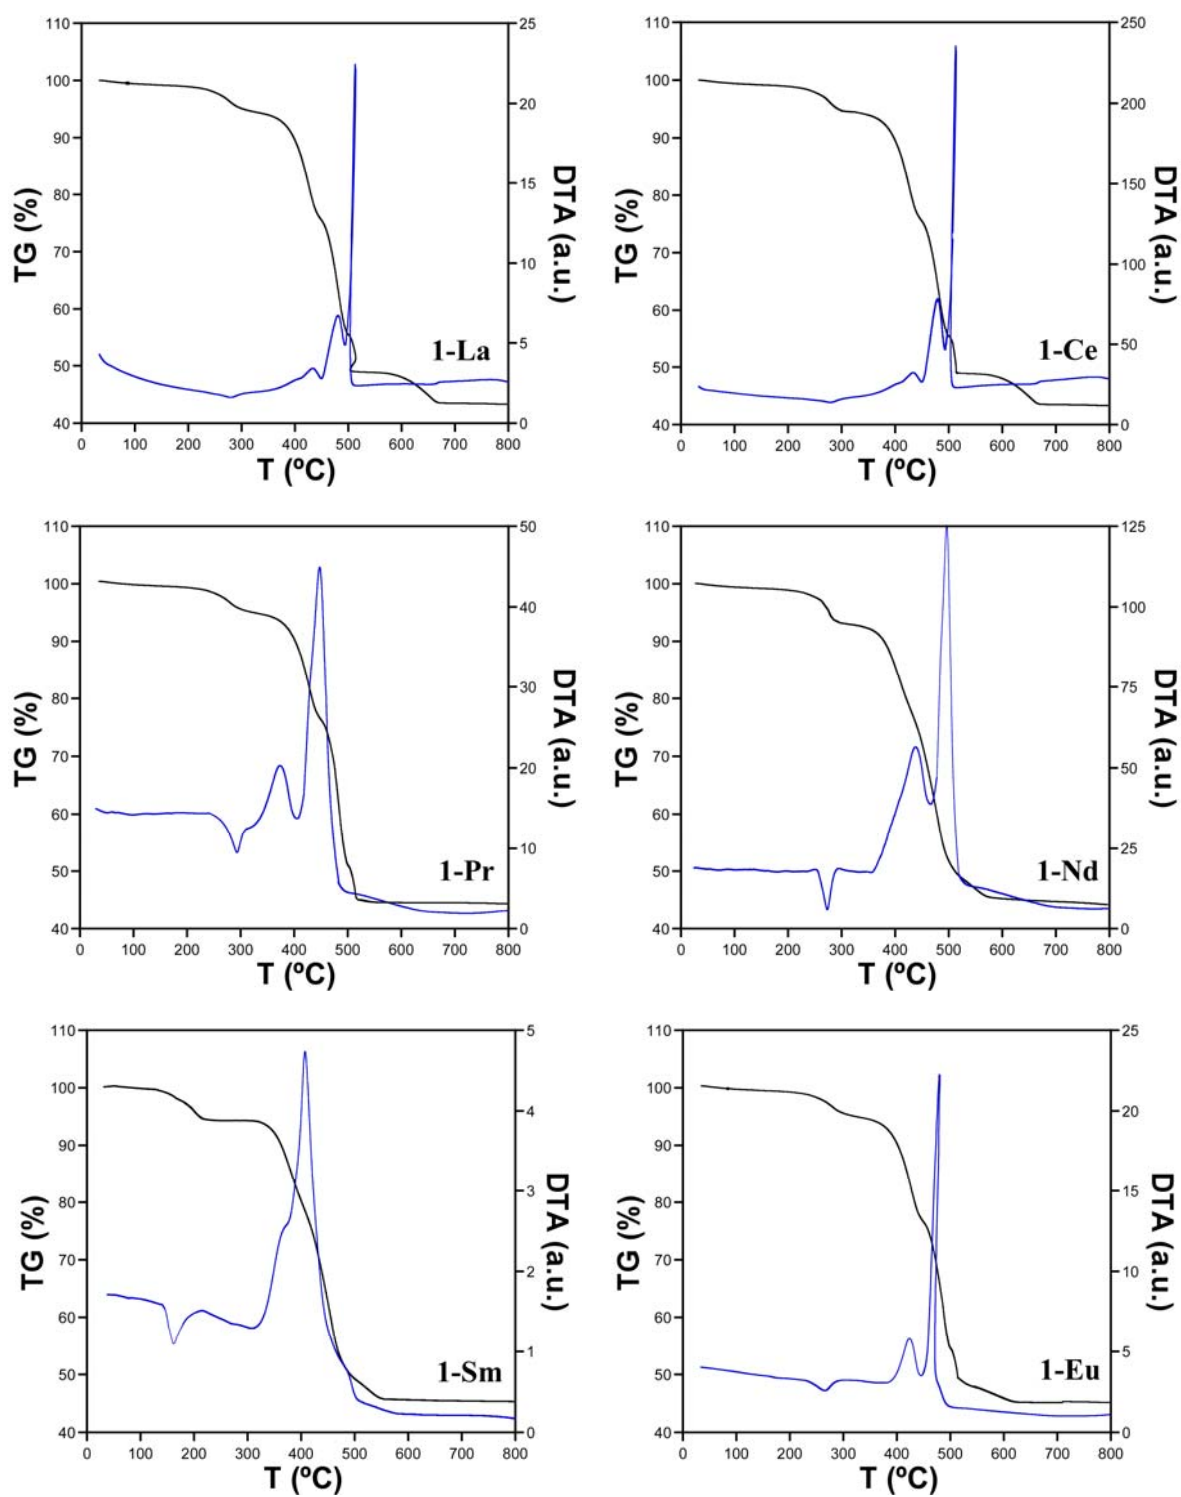

**Figure S8.** Thermogravimetric measurements of all **1-Ln** compounds.

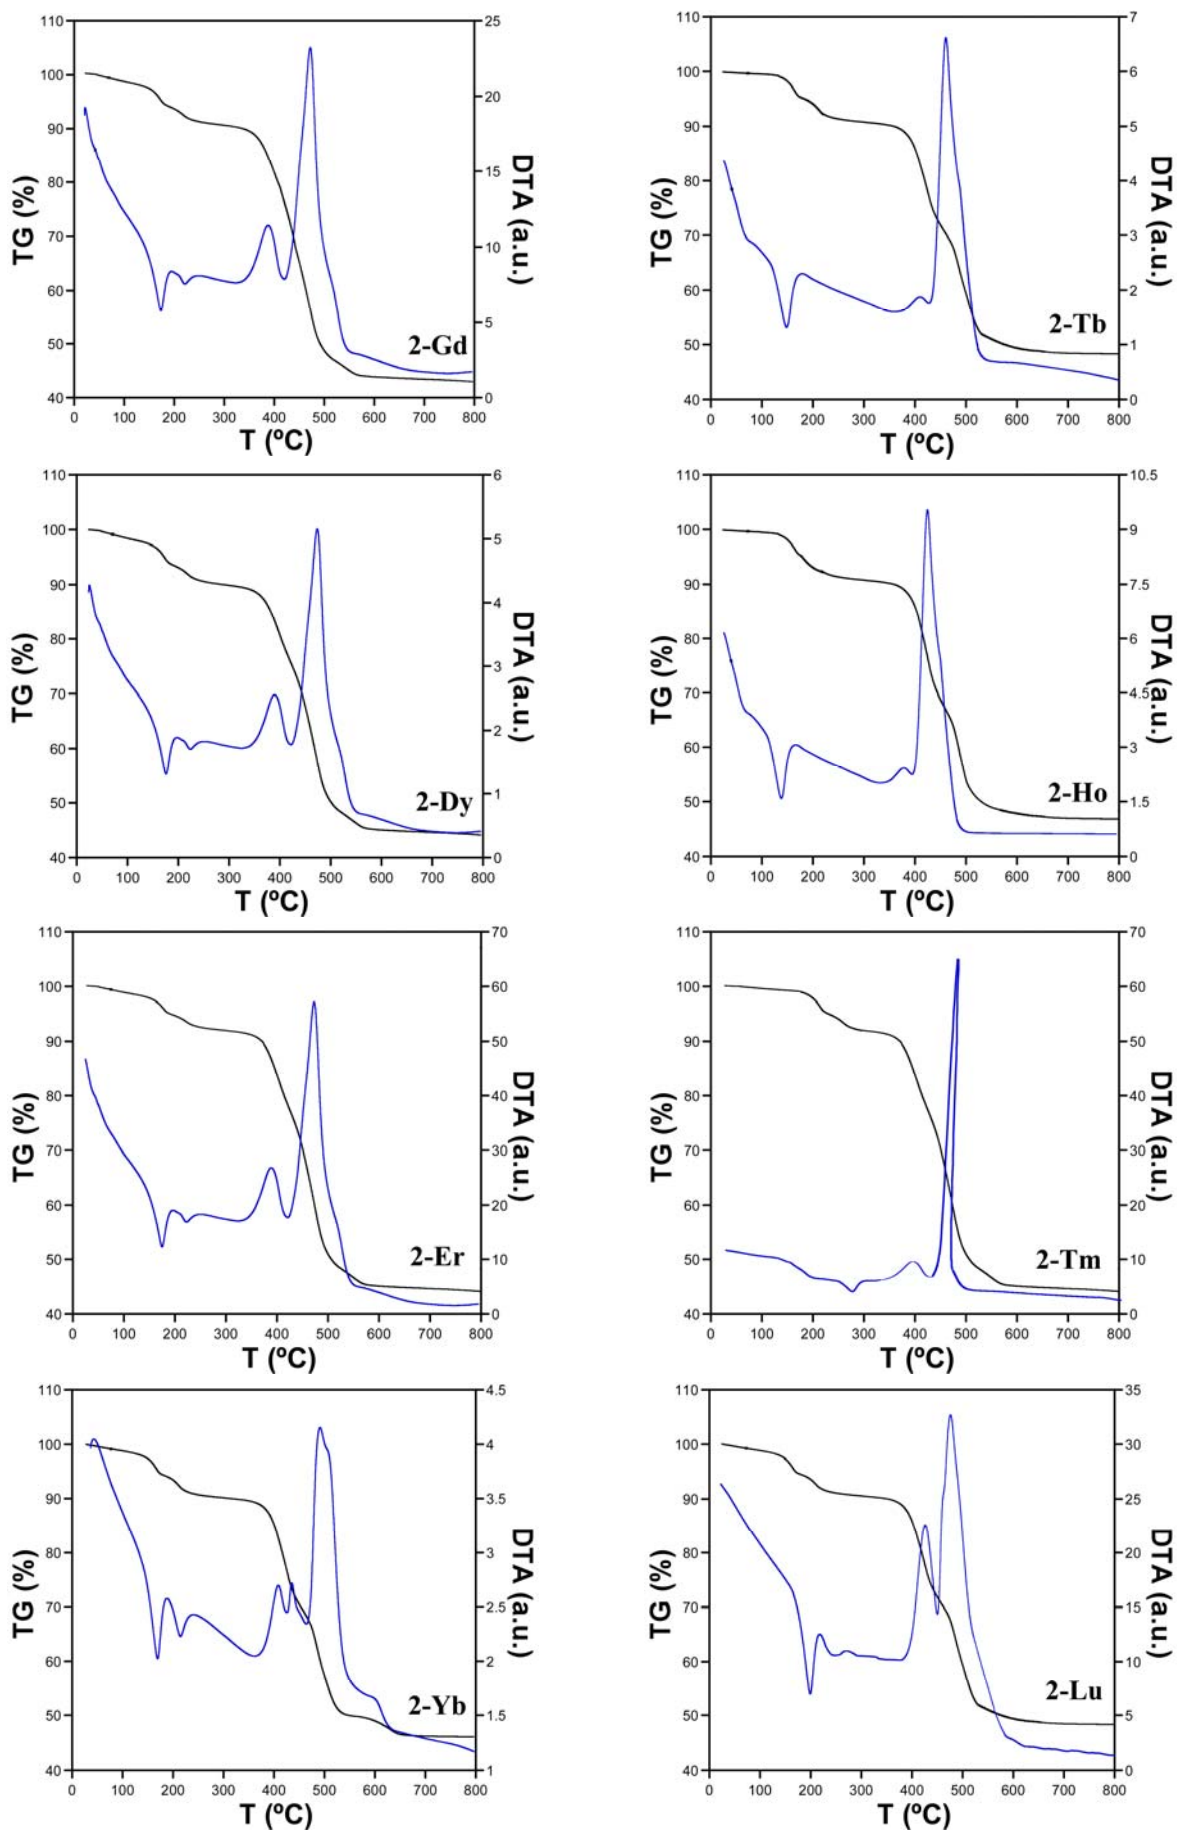

Figure S9. Thermogravimetric measurements of 2-Ln compounds.

**Table S6.** Thermal evolution of the visible emission lifetime values of **1-Ln** and **2-Ln** compounds.

| <i>Step</i> | <i>T<sub>i</sub></i> | <i>T<sub>f</sub></i> | <i>T<sub>peak</sub></i> | <i>Δm(%)</i> | <i>ΔH</i> | <i>ΣΔm(%)</i> | <i>ΣΔm<sub>teor</sub>(%)</i>           |
|-------------|----------------------|----------------------|-------------------------|--------------|-----------|---------------|----------------------------------------|
| <b>1-Ln</b> |                      |                      |                         |              |           |               |                                        |
| 1           | 230                  | 325                  | 280                     | 5.0          | Endo      | 5.0           | 4.7 (-1H <sub>2</sub> O)               |
| 2           | 350                  | 450                  | 430                     | 19.0         | Exo       | 24.0          |                                        |
| 3           | 450                  | 495                  | 480                     | 20.0         | Exo       | 44.0          |                                        |
| 4           | 495                  | 515                  | 510                     | 6.1          | Exo       | 50.1          |                                        |
| 5           | 570                  | 680                  | 590                     | 6.4          | Exo       | 56.5          | 57.7 (La <sub>2</sub> O <sub>3</sub> ) |
| <b>2-Ln</b> |                      |                      |                         |              |           |               |                                        |
| 1           | 25                   | 190                  | 175                     | 6.3          | Endo      | 6.3           | 4.2 (-1H <sub>2</sub> O)               |
| 2           | 190                  | 260                  | 220                     | 3.7          | Endo      | 10.0          | 8.4 (-1H <sub>2</sub> O)               |
| 3           | 320                  | 420                  | 390                     | 13.7         | Exo       | 23.7          |                                        |
| 4           | 420                  | 575                  | 475                     | 32.2         | Exo       | 55.9          | 56.3 (Dy <sub>2</sub> O <sub>3</sub> ) |

[a] *T<sub>i</sub>* = initial temperature; *T<sub>f</sub>* = final temperature; *T<sub>peak</sub>* = DTA peak temperature; *Δm(%)* = mass loss percentage for each process; *ΔH* = process type in the basis of DTA; *ΣΔm(%)* = total mass loss percentage; *ΣΔm(%)<sub>teor</sub>* = theoretical total mass loss percentage. [b] Released water molecules and final residue by compound formula.



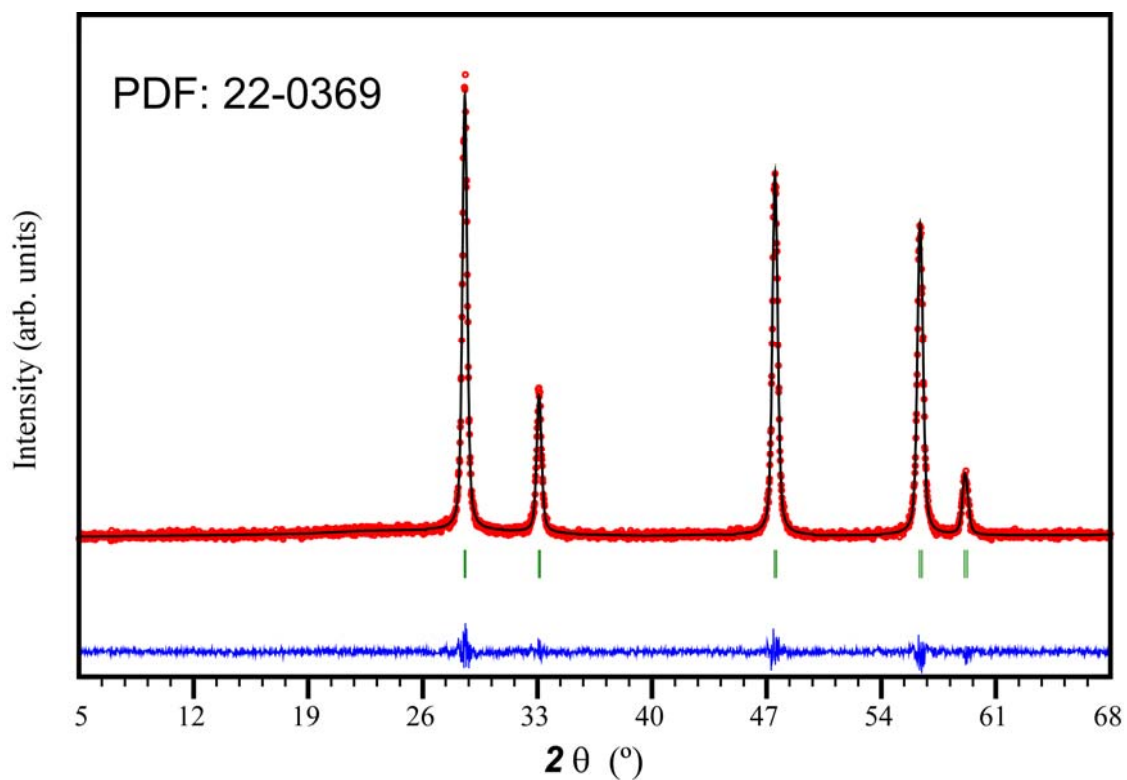

**Figure S10.** Pattern-matching refinement of the  $\text{La}_2\text{O}_3$  thermogravimetric residue.

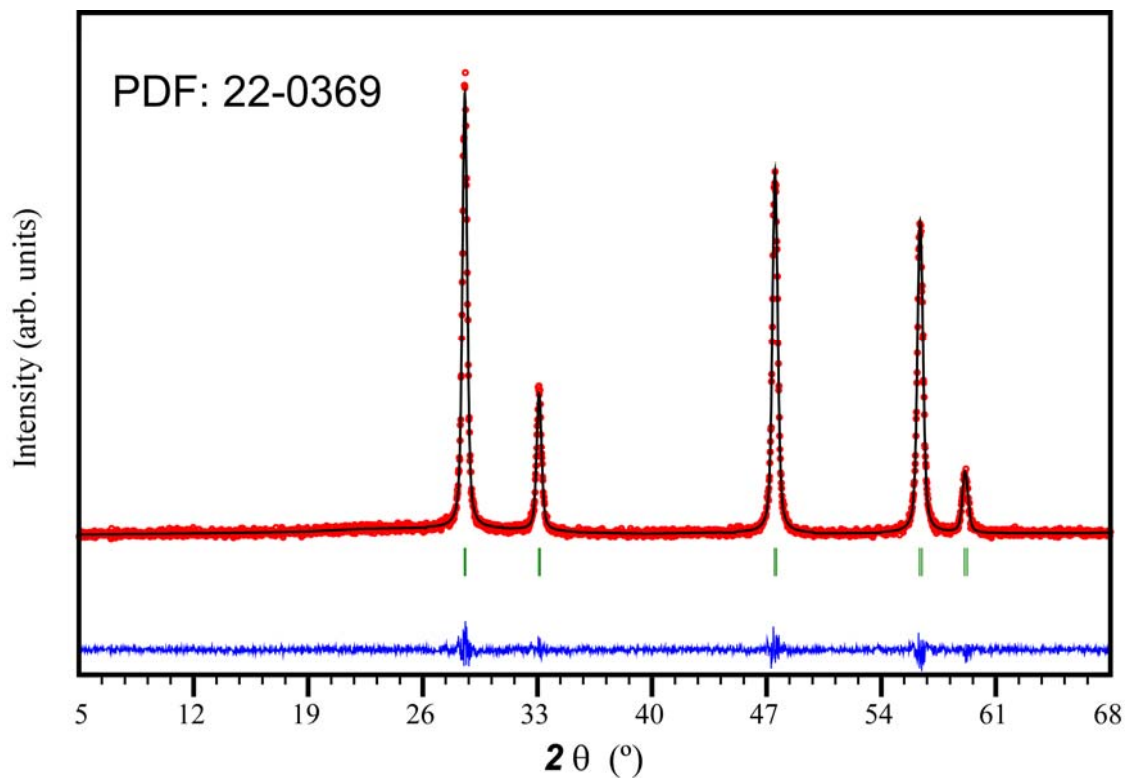

**Figure S11.** Pattern-matching refinement of the  $\text{Gd}_2\text{O}_3$  thermogravimetric residue.

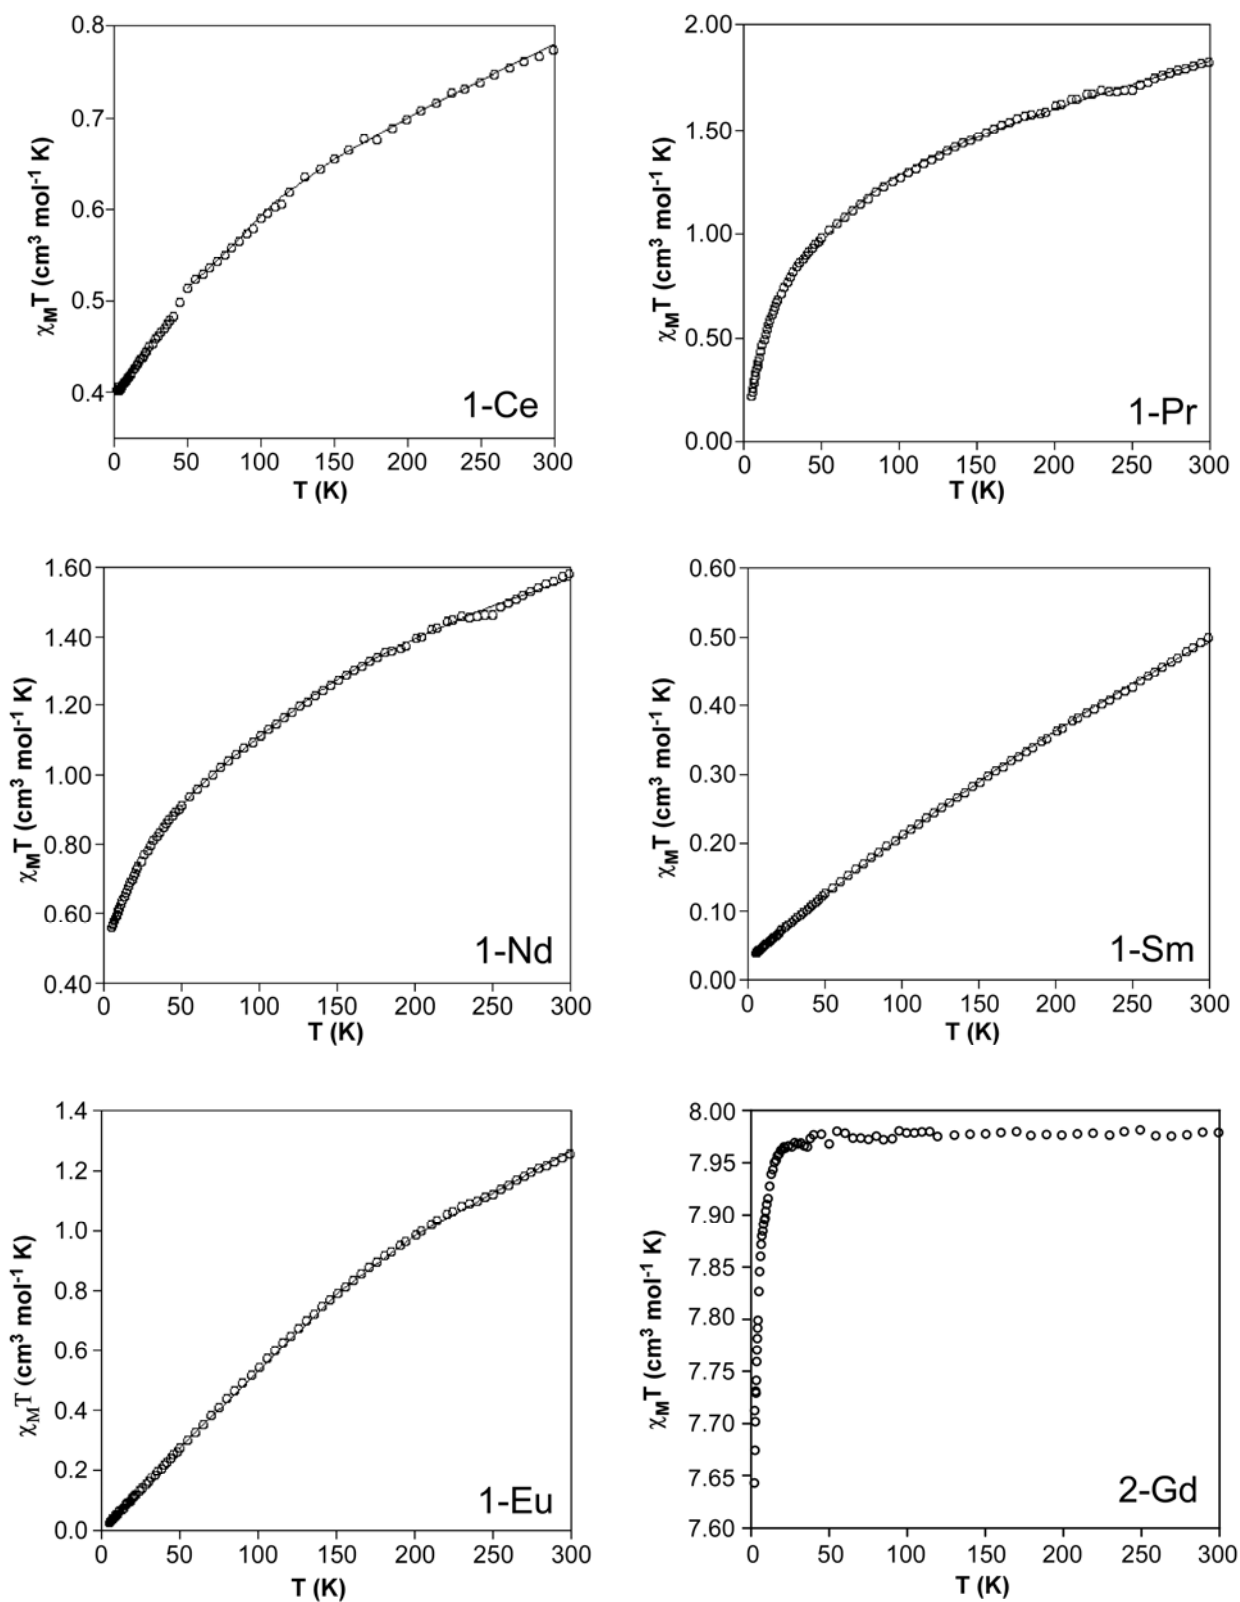

**Figure S12.** Plots of the thermal dependence of the magnetic susceptibility of **1-Ln** and **2-Ln** compounds. (o) and the best theoretical fit (—).

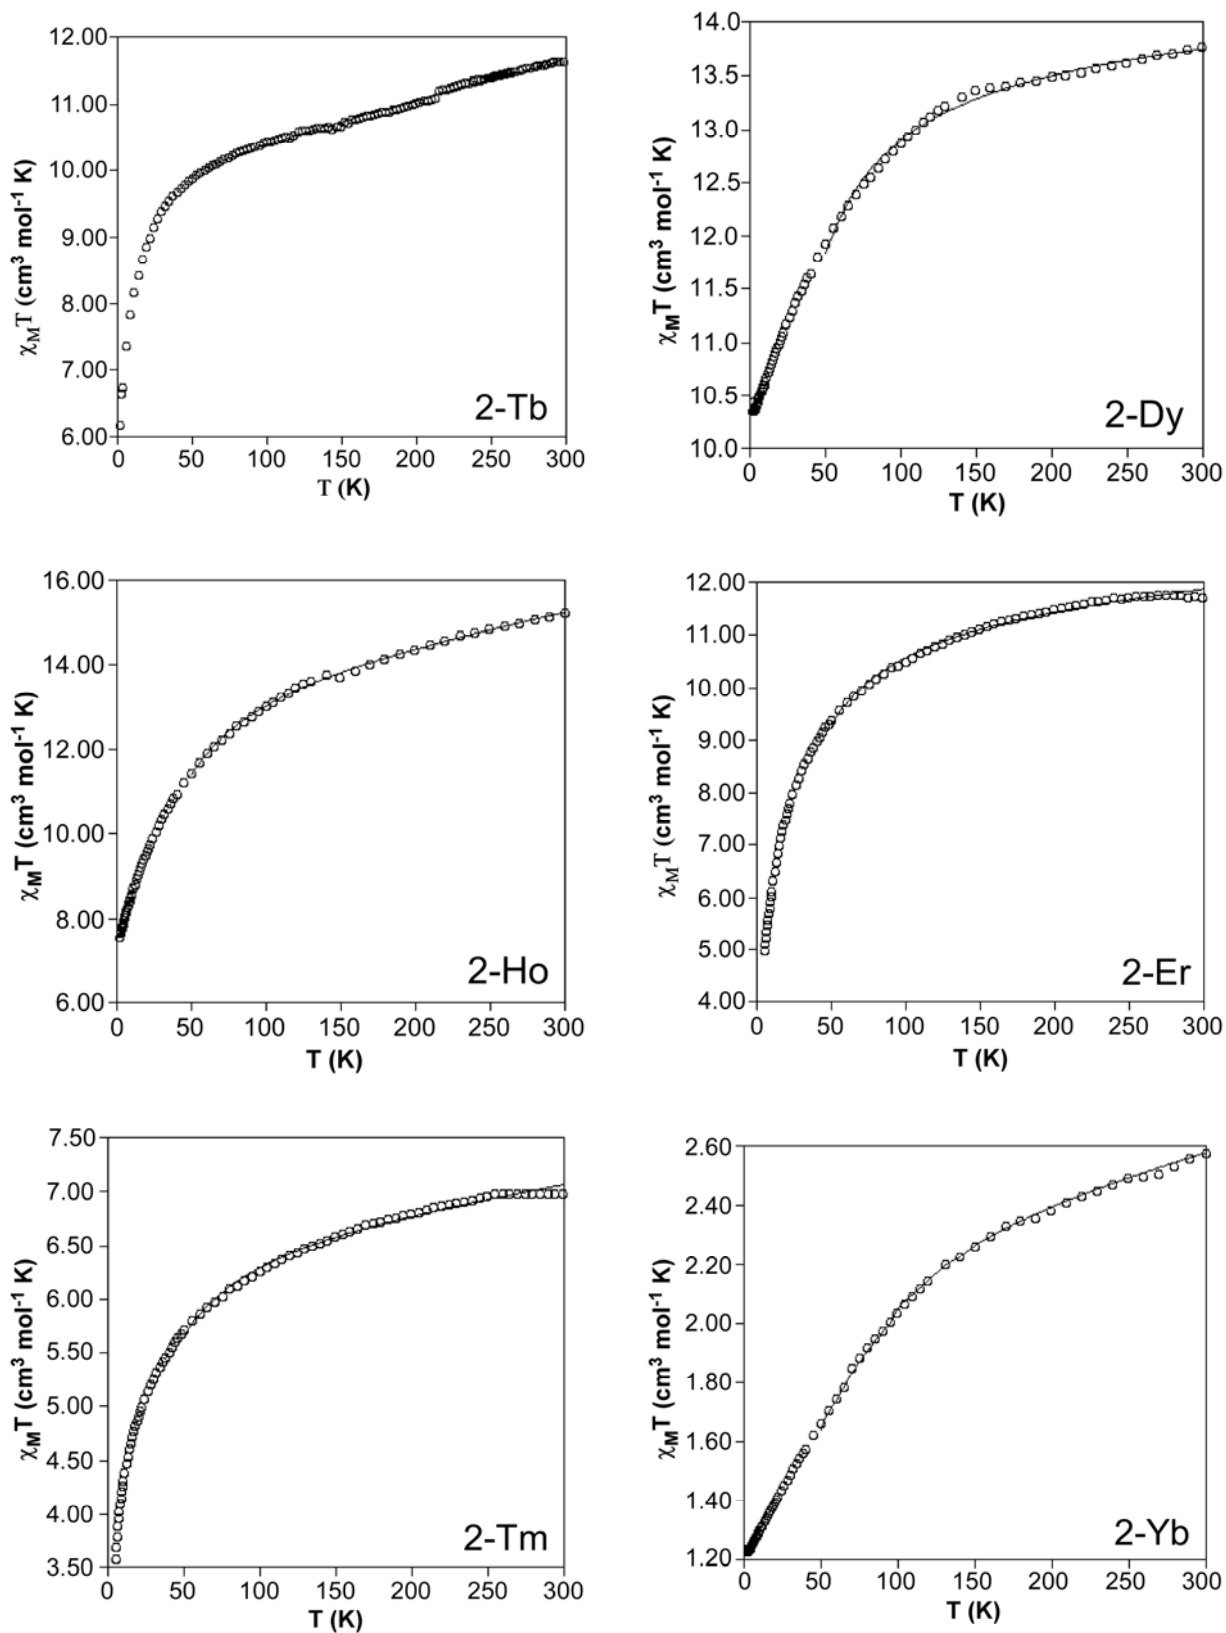

**Figure S13.** Plots of the thermal dependence of the magnetic susceptibility of **1-Ln** and **2-Ln** compounds. (o) and the best theoretical fit (–) (cont.).

$$\chi_{Ce} = \frac{Ng^2 \beta^2}{kT} \frac{50/4e^{-25\Delta/4kT} + 18/4e^{-9\Delta/4kT} + 1/2e^{-\Delta/4kT}}{2e^{-25\Delta/4kT} + 2e^{-9\Delta/4kT} + 2e^{-\Delta/4kT}}$$

$$\chi_{Pr} = \frac{Ng^2 \beta^2}{kT} \frac{2e^{-\Delta/kT} + 8e^{-4\Delta/kT} + 18e^{-9\Delta/kT} + 32e^{-16\Delta/kT}}{1 + 2e^{-\Delta/kT} + 2e^{-4\Delta/kT} + 2e^{-9\Delta/kT} + 2e^{-16\Delta/kT}}$$

$$\chi_{Nd} = \frac{Ng^2 \beta^2}{4kT} \frac{81e^{-81\Delta/4kT} + 49e^{-49\Delta/4kT} + 25e^{-25\Delta/4kT} + 9e^{-9\Delta/4kT} + e^{-9\Delta/4kT}}{e^{-81\Delta/4kT} + e^{-49\Delta/4kT} + e^{-25\Delta/4kT} + e^{-9\Delta/4kT} + e^{-9\Delta/4kT}}$$

$$\chi_{Sm} = \frac{N\beta^2}{3kTx} \left( \frac{2.143x + 7.347 + (42.92x + 1.641)e^{-7x/2} + (283.7x - 0.6571)e^{-8x}}{3 + 4e^{-7x/2} + 5e^{-8x} + 6e^{-27x/2} + 7e^{-20x} + 8e^{-55x/2}} \right. \\ \left. + \frac{(620.6x - 1.94)e^{-27x/2} + (1122x - 2.835)e^{-20x} + (1813x - 3.556)e^{-55x/2}}{3 + 4e^{-7x/2} + 5e^{-8x} + 6e^{-27x/2} + 7e^{-20x} + 8e^{-55x/2}} \right)$$

$$\chi_{Eu} = \frac{N\beta^2}{3kTx} \left( \frac{24 + (27x - 3)/2e^{-x} + (135x - 5)/2e^{-3x} + (189x - 7/2)e^{-6x}}{1 + 3e^{-x} + 5e^{-3x} + 7e^{-6x} + 9e^{-10x} + 11e^{-15x} + 13e^{-21x}} \right. \\ \left. + \frac{(405x - 9/2)e^{-10x} + (1485x - 11)/2e^{-27x} + (2457x - 13)2e^{-21x}}{1 + 3e^{-x} + 5e^{-3x} + 7e^{-6x} + 9e^{-10x} + 11e^{-15x} + 13e^{-21x}} \right)$$

$$\chi_{Gd} = \frac{Ng^2 \beta^2}{3kT} \frac{S(S+1)(W_1 + W_2)}{(1-u^2)^2}$$

$$\chi_{Tb} = \frac{Ng^2 \beta^2}{kT} \frac{2e^{-\Delta/kT} + 4e^{-2\Delta/kT} + 18e^{-9\Delta/kT} + 32e^{-16\Delta/kT} + 50e^{-25\Delta/kT} + 72e^{-36\Delta/kT}}{1 + 2e^{-\Delta/kT} + 2e^{-2\Delta/kT} + 2e^{-9\Delta/kT} + 2e^{-16\Delta/kT} + 2e^{-25\Delta/kT} + 2e^{-36\Delta/kT}}$$

$$\chi_{Dy} = \frac{Ng^2 \beta^2}{kT} \left( \frac{0.5e^{-0.25\Delta/kT} + 4.5e^{-2.25\Delta/kT} + 12.5e^{-6.25\Delta/kT} + 24.5e^{-12.25\Delta/kT}}{1 + 2e^{-\Delta/kT} + 2e^{-2\Delta/kT} + 2e^{-9\Delta/kT} + 2e^{-16\Delta/kT} + 2e^{-25\Delta/kT} + 2e^{-36\Delta/kT}} + \right. \\ \left. \frac{40.5e^{-20.25\Delta/kT} + 60.5e^{-30.25\Delta/kT} + 84.5e^{-42.25\Delta/kT} + 112.5e^{-56.25\Delta/kT}}{1 + 2e^{-\Delta/kT} + 2e^{-2\Delta/kT} + 2e^{-9\Delta/kT} + 2e^{-16\Delta/kT} + 2e^{-25\Delta/kT} + 2e^{-36\Delta/kT}} \right)$$

$$\chi_{Ho} = \frac{Ng^2 \beta^2}{kT} \left( \frac{2e^{-\Delta/kT} + 8e^{-4\Delta/kT} + 18e^{-9\Delta/kT} + 32e^{-16\Delta/kT} + 50e^{-25\Delta/kT} + 72e^{-36\Delta/kT} + 98e^{-49\Delta/kT} + 128e^{-64\Delta/kT}}{1 + 2e^{-\Delta/kT} + 2e^{-4\Delta/kT} + 2e^{-9\Delta/kT} + 2e^{-16\Delta/kT} + 2e^{-25\Delta/kT} + 2e^{-36\Delta/kT} + 2e^{-49\Delta/kT} + 2e^{-64\Delta/kT}} \right)$$

$$\chi_{Er} = \frac{Ng^2 \beta^2}{kT} \left( \frac{0.5e^{-0.25\Delta/kT} + 4.5e^{-2.25\Delta/kT} + 12.5e^{-6.25\Delta/kT} + 24.5e^{-12.25\Delta/kT}}{1 + 2e^{-\Delta/kT} + 2e^{-2\Delta/kT} + 2e^{-9\Delta/kT} + 2e^{-16\Delta/kT} + 2e^{-25\Delta/kT} + 2e^{-36\Delta/kT}} + \right. \\ \left. \frac{40.5e^{-20.25\Delta/kT} + 60.5e^{-30.25\Delta/kT} + 84.5e^{-42.25\Delta/kT} + 112.5e^{-56.25\Delta/kT}}{1 + 2e^{-\Delta/kT} + 2e^{-2\Delta/kT} + 2e^{-9\Delta/kT} + 2e^{-16\Delta/kT} + 2e^{-25\Delta/kT} + 2e^{-36\Delta/kT}} \right)$$

$$\chi_{Tm} = \frac{Ng^2 \beta^2}{kT} \left( \frac{2e^{-\Delta/kT} + 4e^{-2\Delta/kT} + 18e^{-9\Delta/kT} + 32e^{-16\Delta/kT} + 50e^{-25\Delta/kT} + 72e^{-36\Delta/kT}}{1 + 2e^{-\Delta/kT} + 2e^{-2\Delta/kT} + 2e^{-9\Delta/kT} + 2e^{-16\Delta/kT} + 2e^{-25\Delta/kT} + 2e^{-36\Delta/kT}} \right)$$

$$\chi_{Yb} = \frac{Ng^2\beta^2}{kT} \left( \frac{0.5e^{-0.25\Delta/kT} + 1.5e^{-0.75\Delta/kT} + 2.5e^{-1.125\Delta/kT} + 3.5e^{-1.75\Delta/kT}}{2e^{-0.25\Delta/kT} + 2e^{-0.75\Delta/kT} + 2e^{-1.125\Delta/kT} + 2e^{-1.75\Delta/kT}} \right)$$

**Scheme S1.** Mathematical expressions describing the temperature dependence of the magnetic susceptibility due to the depopulation of the excited Stark levels.

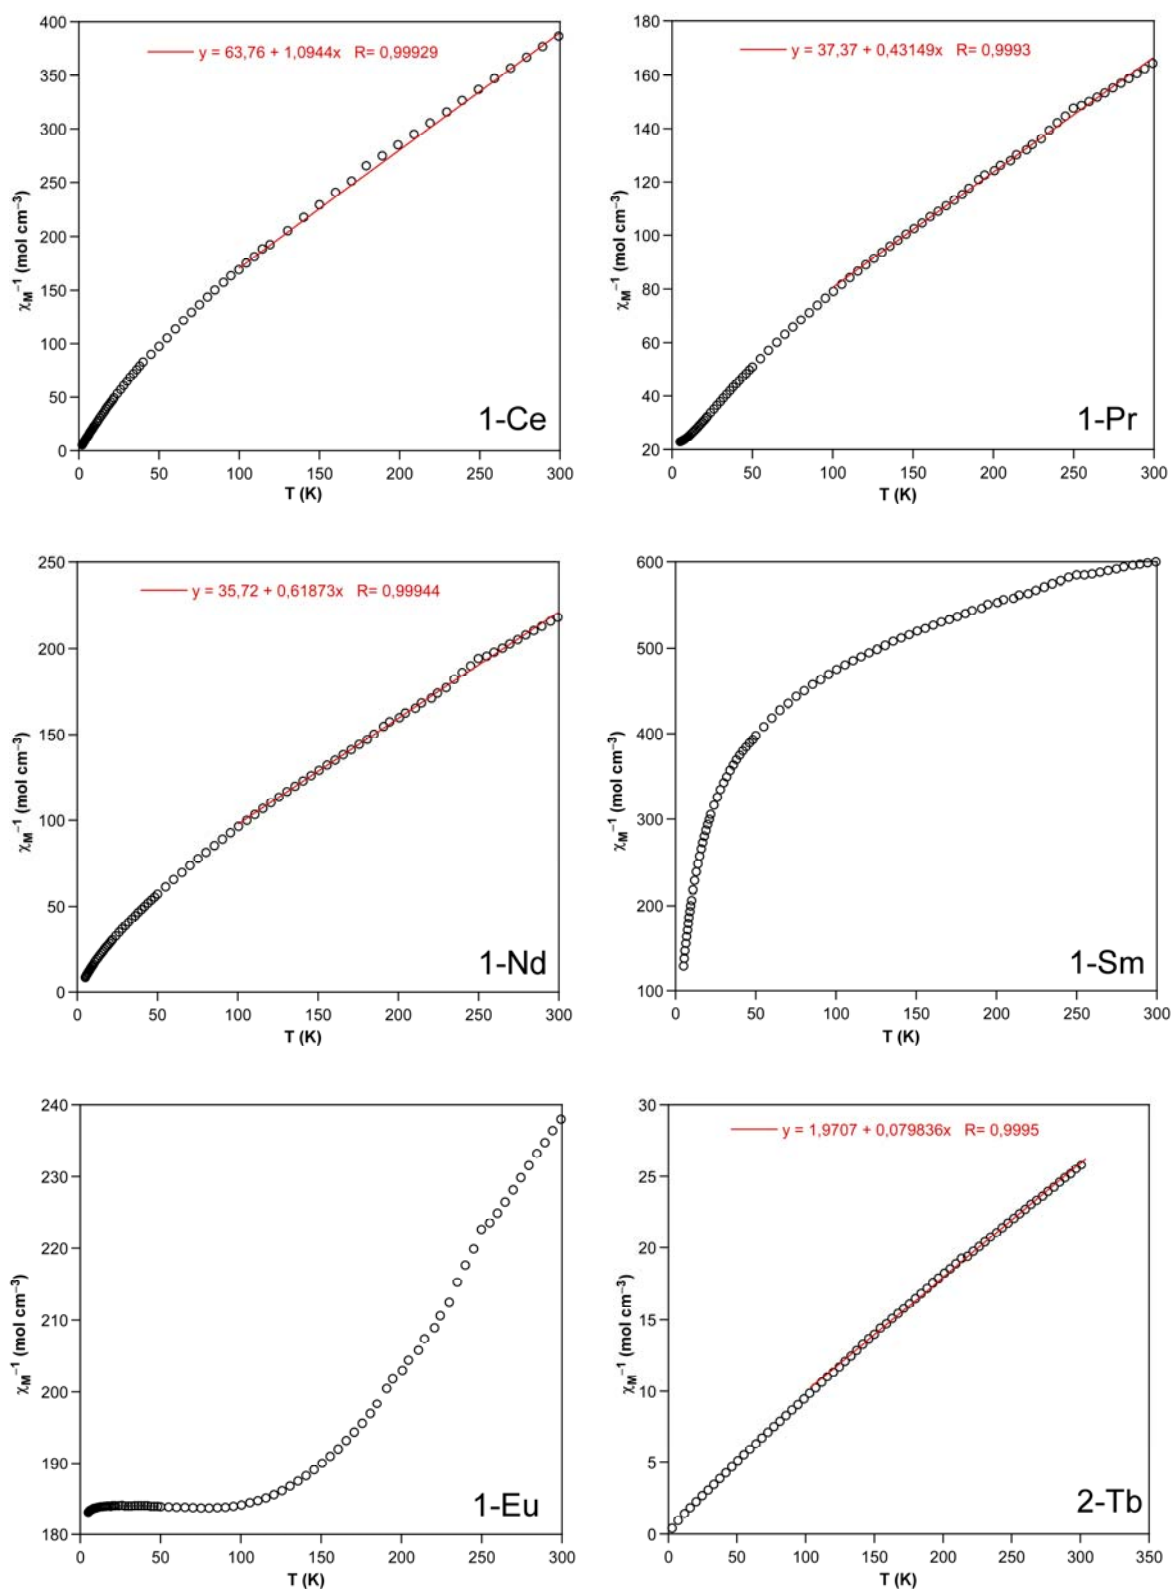

**Figure S14.** Curie-Weiss fit of the  $\chi_M^{-1}$  vs  $T$  curves of **1-Ln** and **2-Ln** compounds.

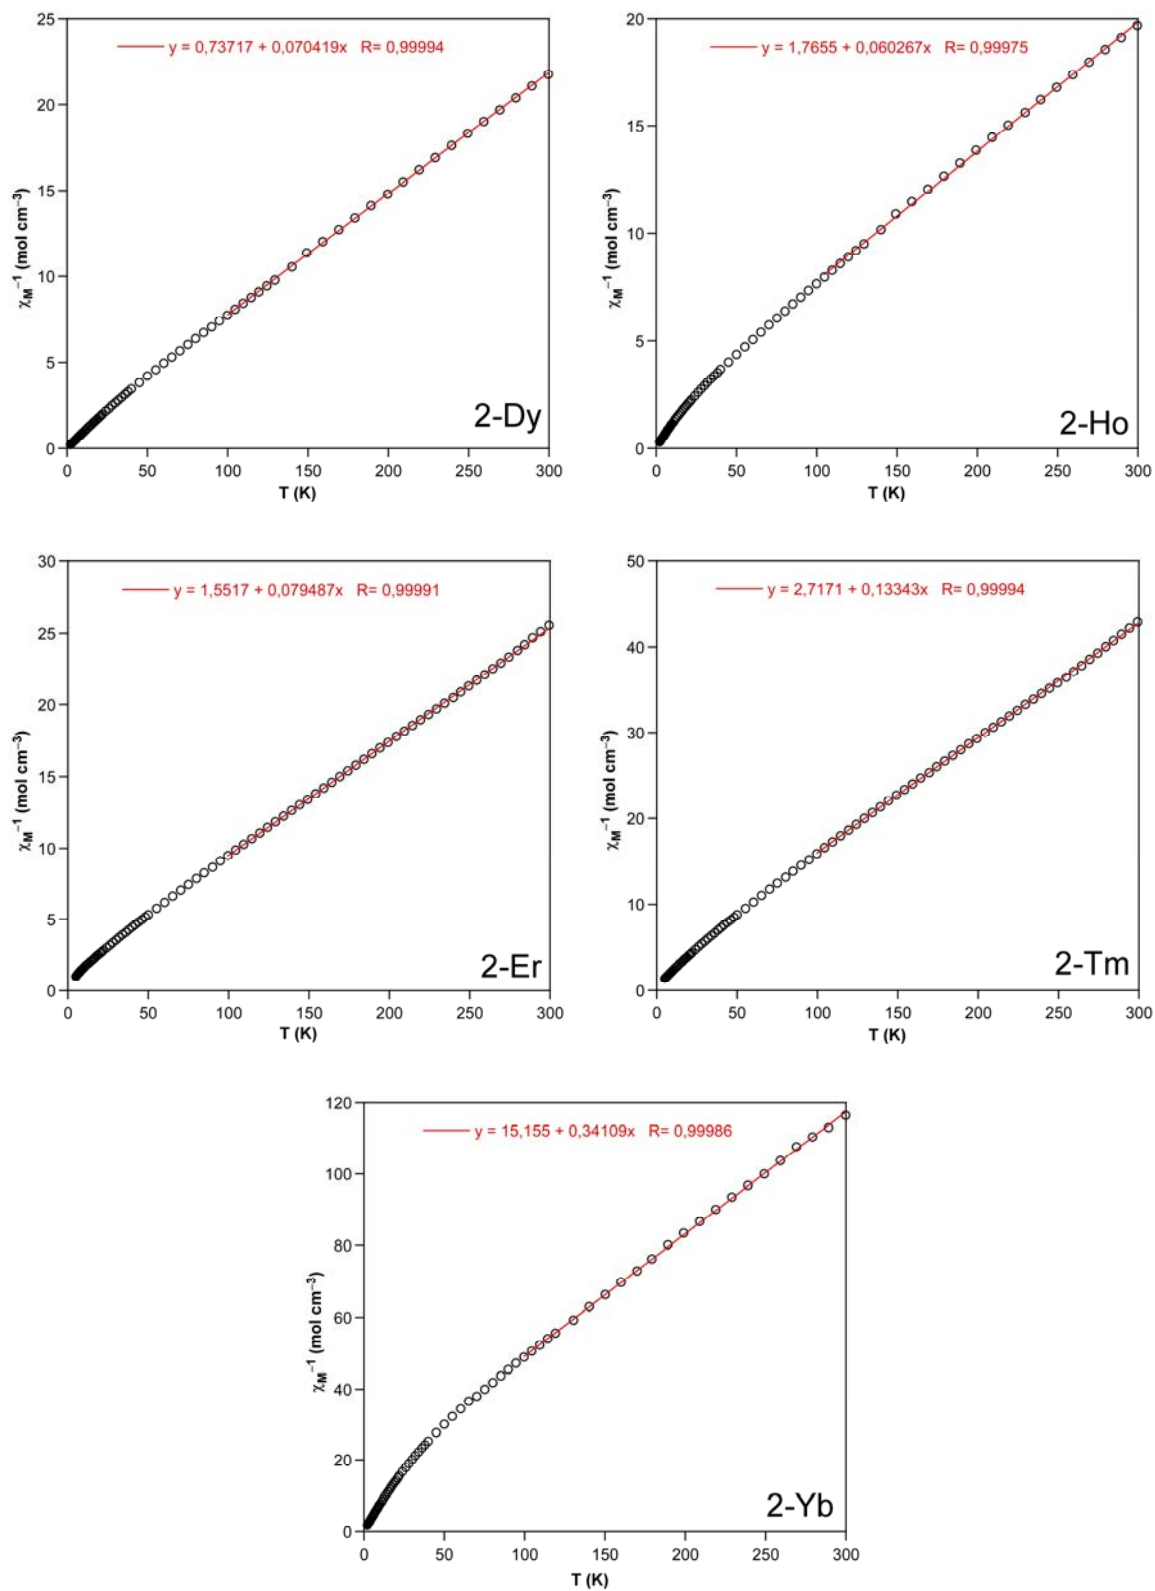

**Figure S14.** Curie-Weiss fit of the  $\chi_M^{-1}$  vs  $T$  curves of 1-Ln and 2-Ln compounds (cont.).

**Table 7.** Best least-squares fits of the experimental magnetic data.<sup>[a]</sup>

| Compound    | g    | $\Delta$ (cm <sup>-1</sup> )  | C / $\theta$   |
|-------------|------|-------------------------------|----------------|
| <b>1-Ce</b> | 0.84 | 5.15                          | 0.91 / -58.26  |
| <b>1-Pr</b> | 0.76 | 3.02                          | 2.32 / -86.61  |
| <b>1-Nd</b> | 0.72 | 2.51                          | 1.62 / -57.73  |
| <b>2-Tb</b> | 1.45 | 0.10                          | 12.53 / -24.68 |
| <b>2-Dy</b> | 1.30 | 0.34                          | 14.20 / -10.47 |
| <b>2-Ho</b> | 1.24 | 0.40                          | 16.59 / -29.29 |
| <b>2-Er</b> | 1.22 | 0.48                          | 12.58 / -19.52 |
| <b>2-Tm</b> | 1.13 | 0.56                          | 7.49 / -20.36  |
| <b>2-Yb</b> | 1.12 | 3.12                          | 2.93 / -44.43  |
| Compound    | g    | $\lambda$ (cm <sup>-1</sup> ) |                |
| <b>1-Sm</b> | 0.28 | 235                           |                |
| <b>1-Eu</b> | 5.01 | 365                           |                |

[a]  $\Delta$  is the zero-field splitting parameter,  $\lambda$  is the spin-orbit coupling parameter, C is the Curie constant and  $\theta$  corresponds to the Weiss parameter for intermolecular interactions. **1-Sm** and **1-Eu** compounds do not follow the Curie-Weiss law due to the thermal population of the excited states.



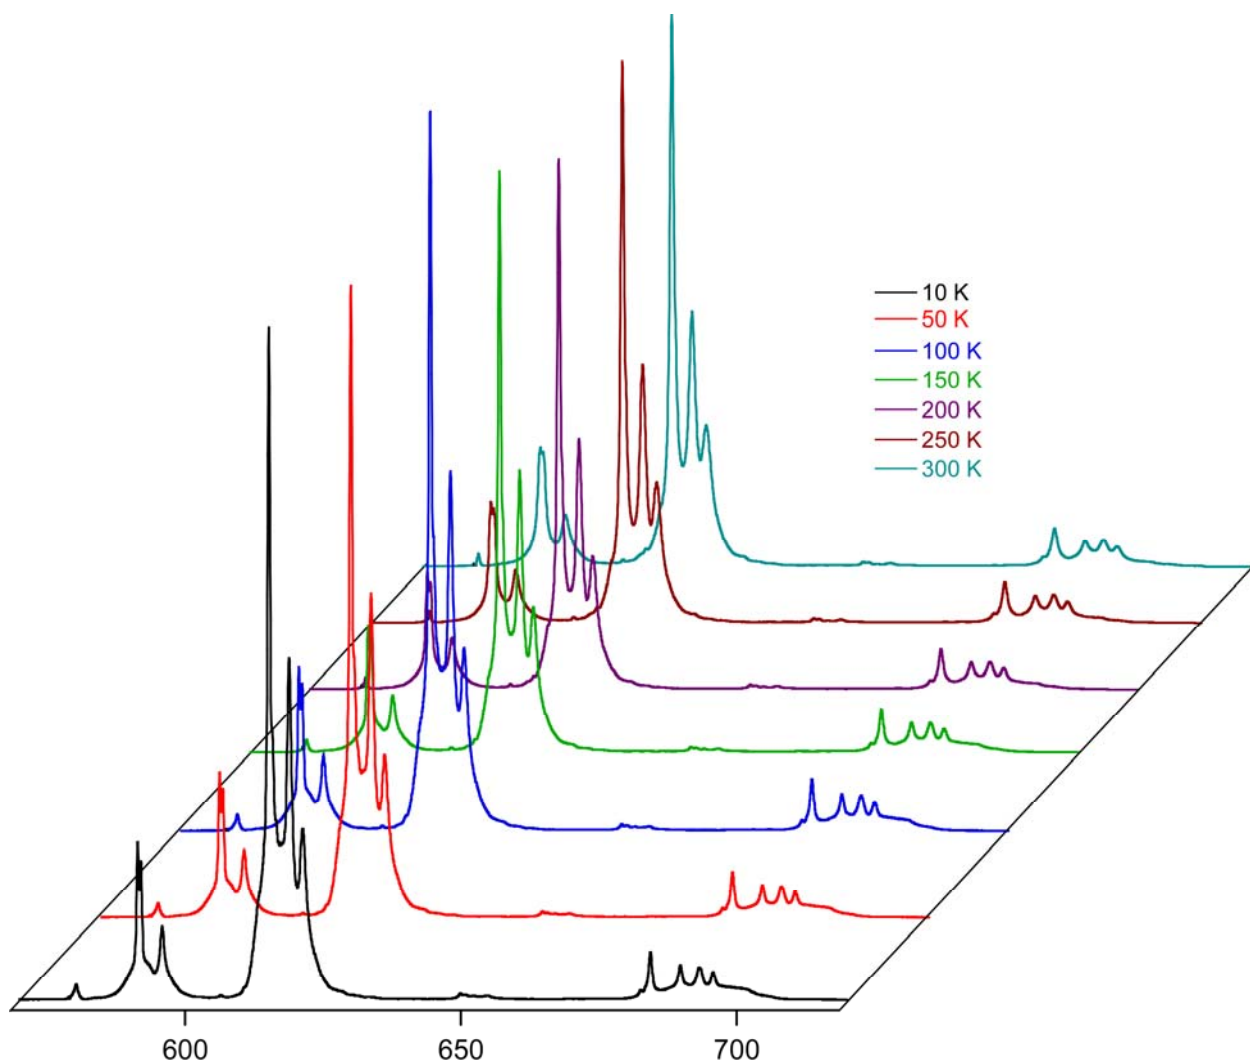

**Figure S15.** Thermal evolution of the emission spectrum of **1-Eu** excited at 325 nm.

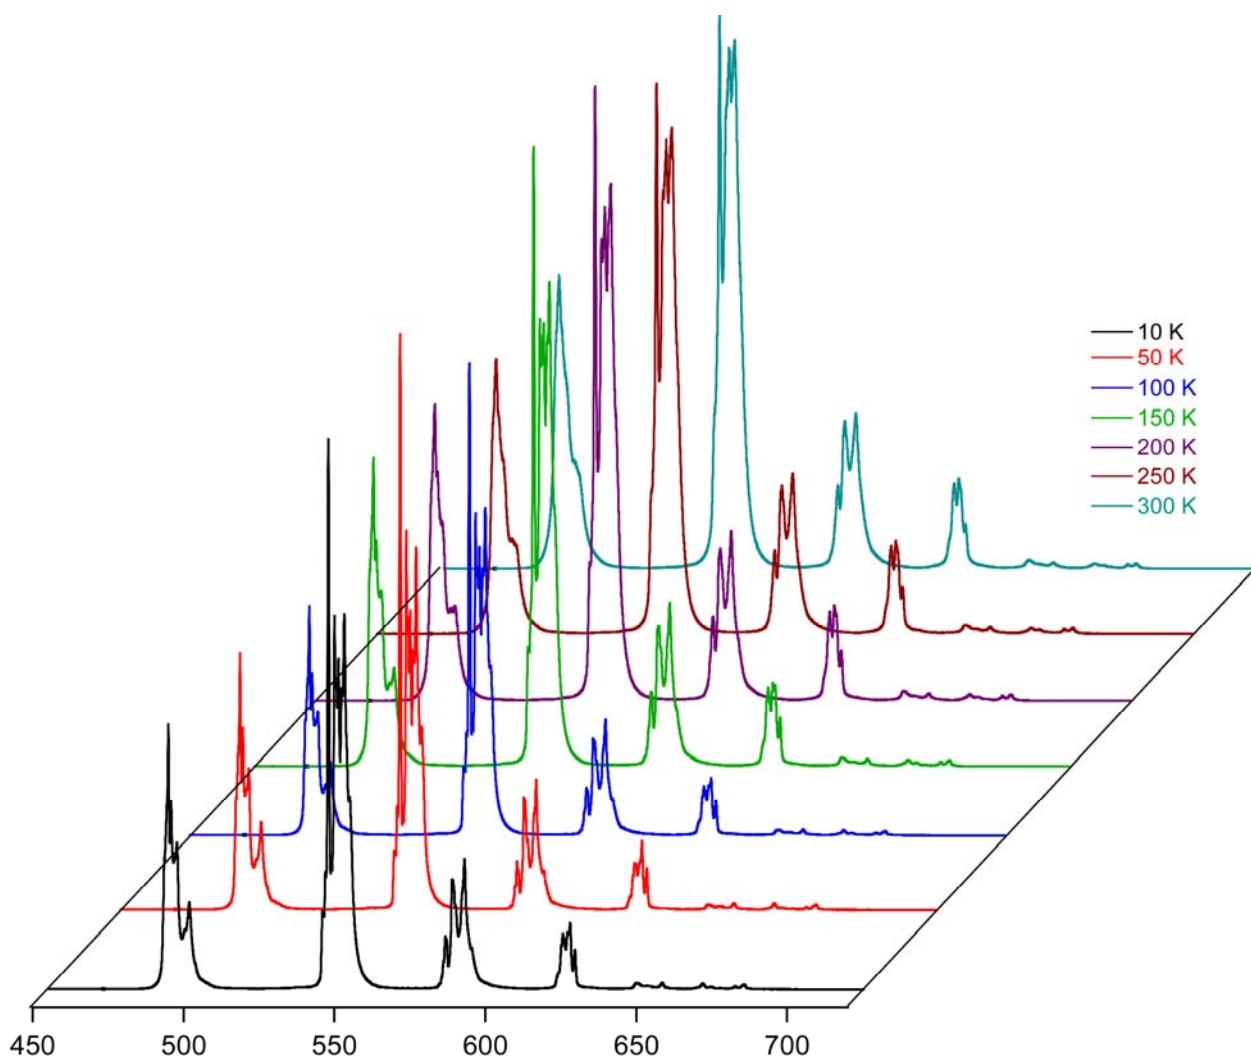

**Figure S16.** Thermal evolution of the emission spectrum of **2-Tb** excited at 325 nm.

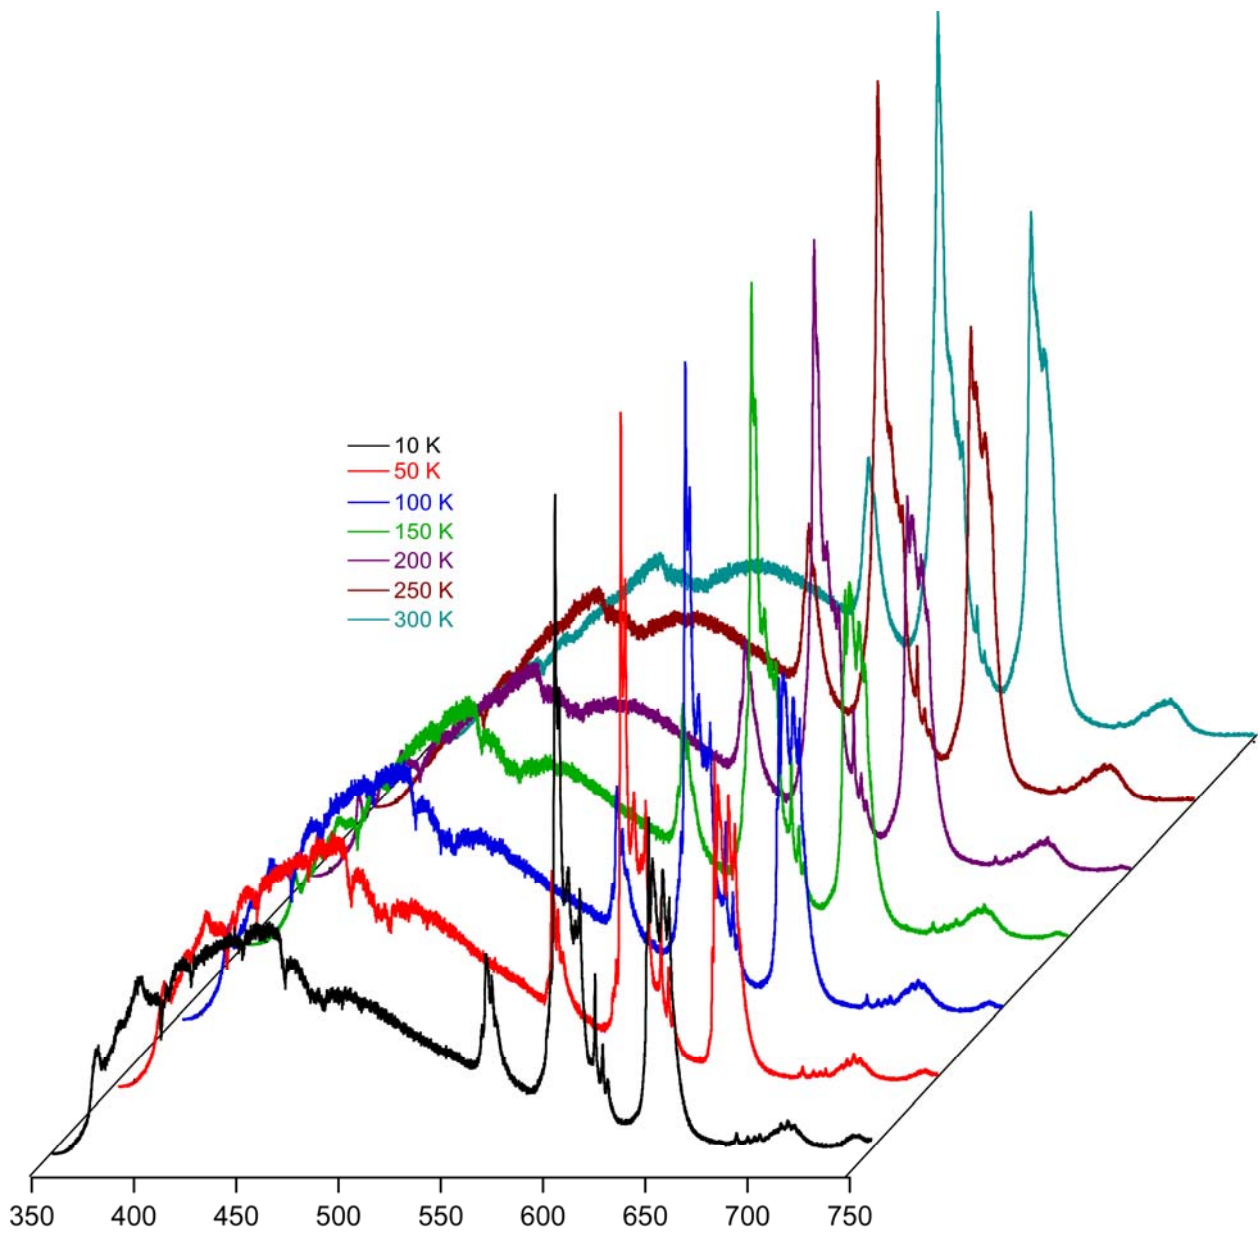

**Figure S17.** Thermal evolution of the emission spectrum of **1-Sm** excited at 325 nm.

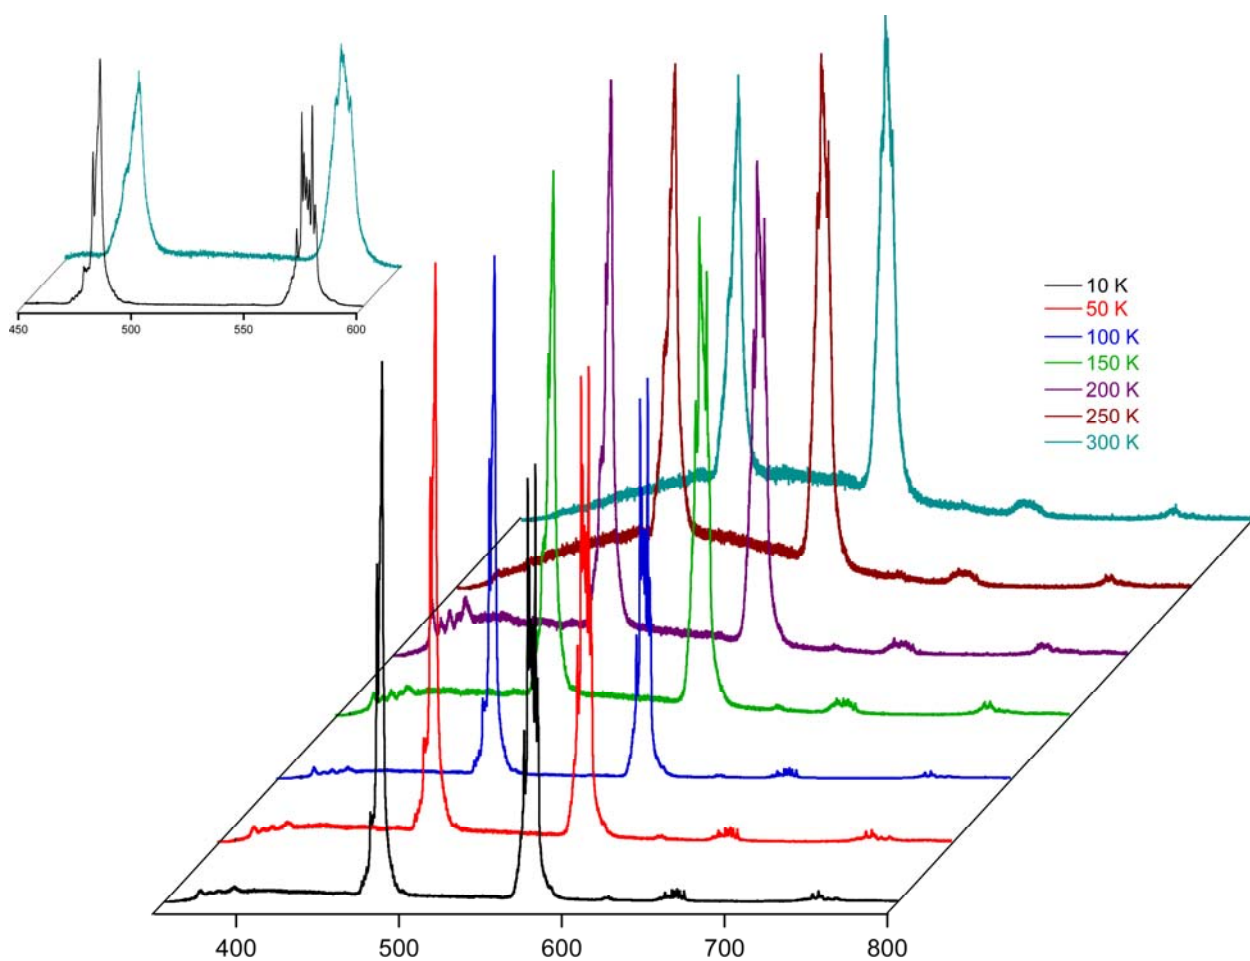

**Figure S18.** Thermal evolution of the emission spectrum of **2-Dy** excited at 325 nm.

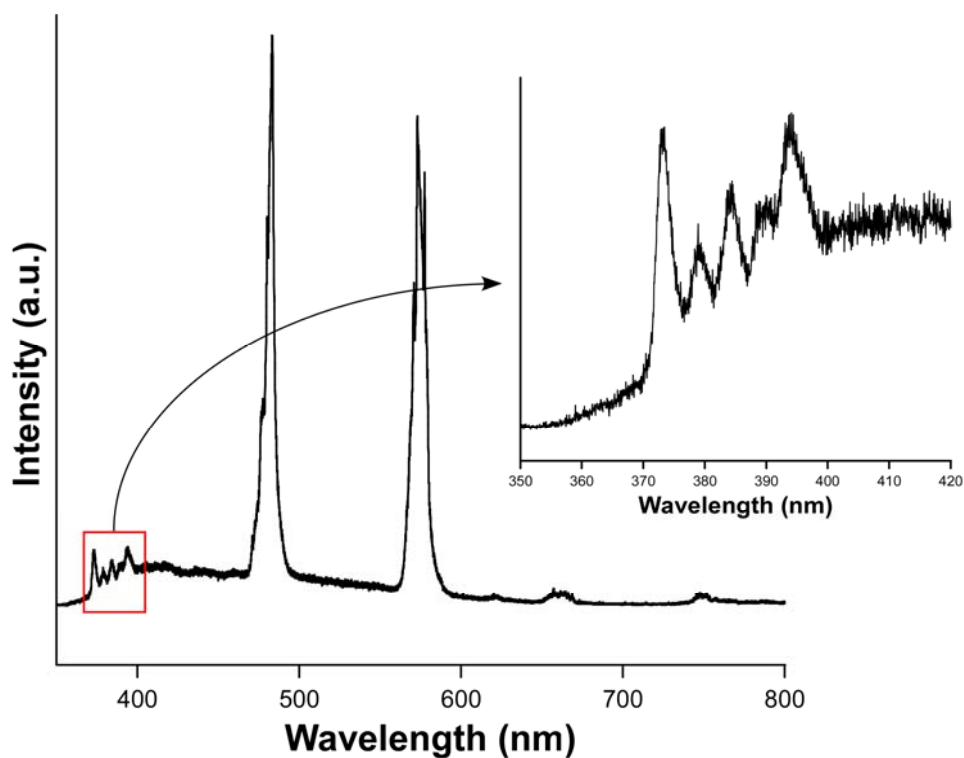

**Figure S19.** Examination of the ligand fluorescence at 200 K in **2-Dy** compound.

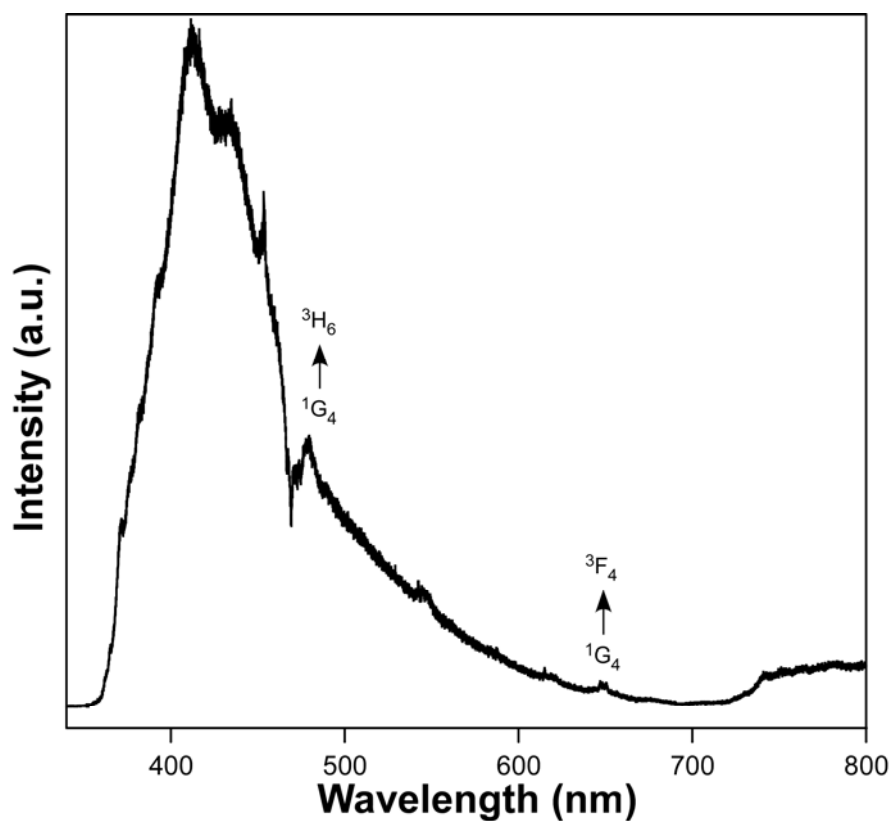

Figure S20. 10K emission spectrum of 2-Tm excited at 325 nm.

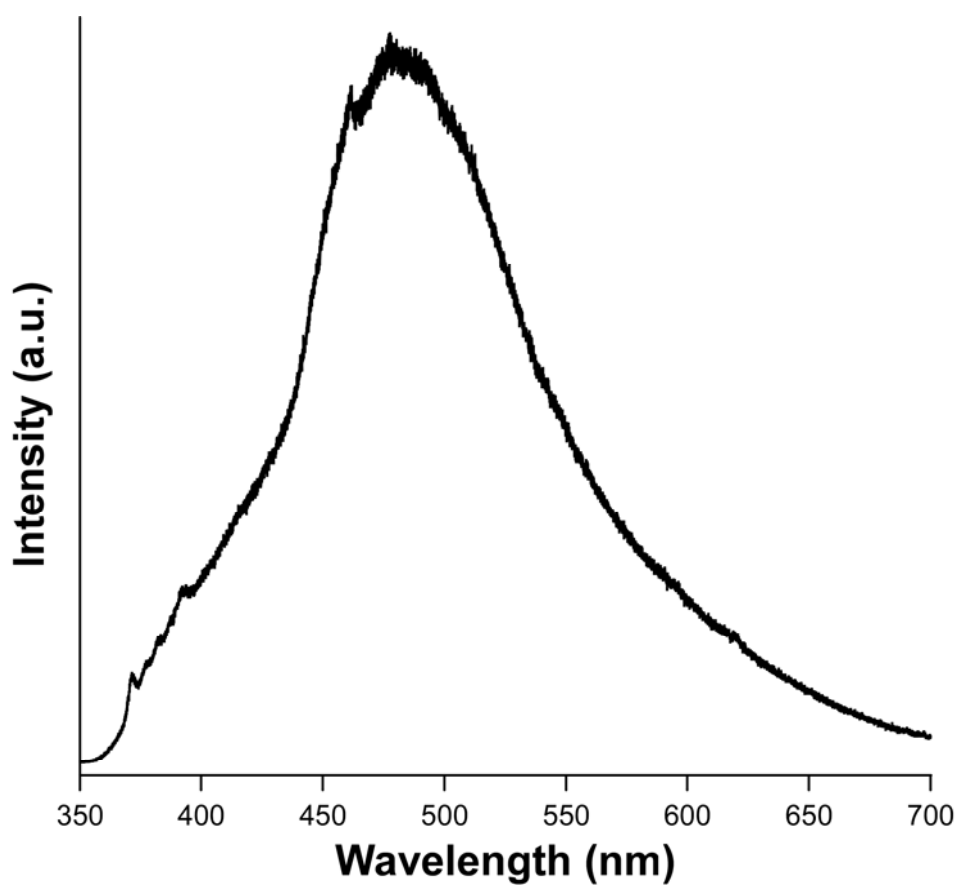

Figure S21. 10K emission spectrum of 2-Gd excited at 325 nm.

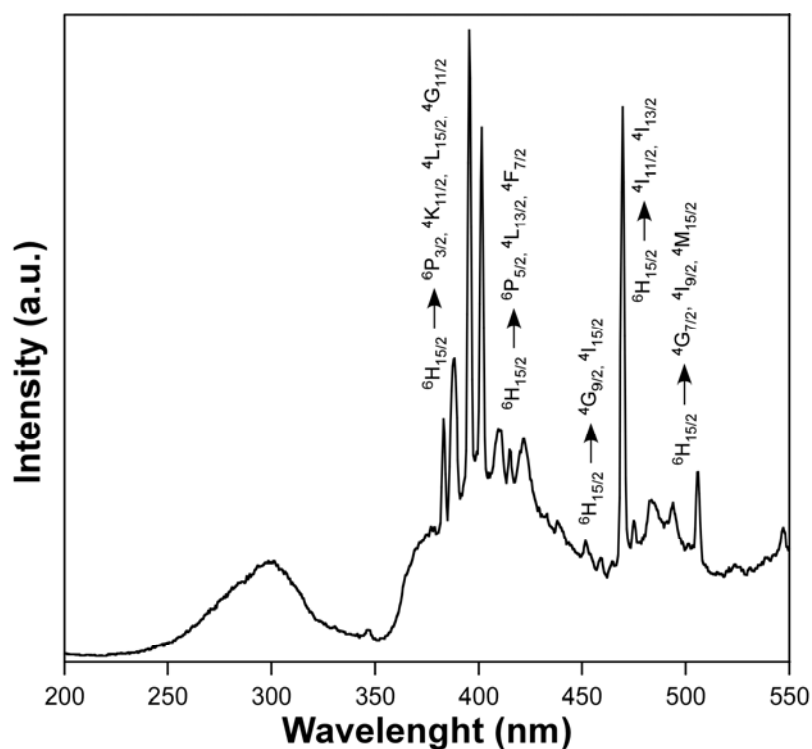

Figure S22. 10K excitation spectrum of **1-Sm** focusing the 595 nm emission line.

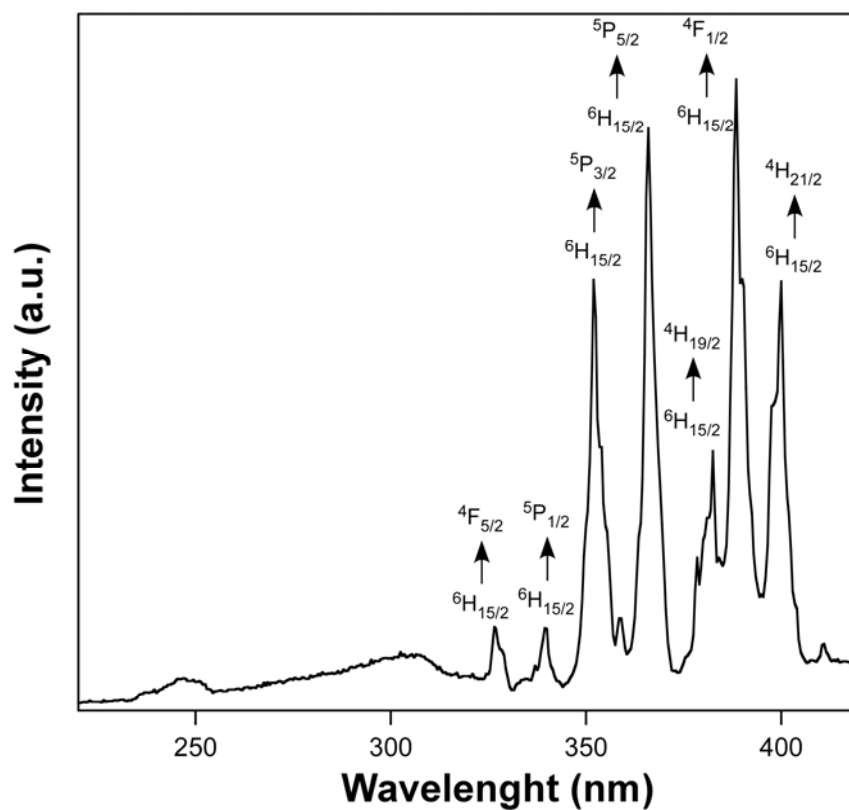

Figure S23. 10K excitation spectrum of **2-Dy** focusing the 483 nm emission line.

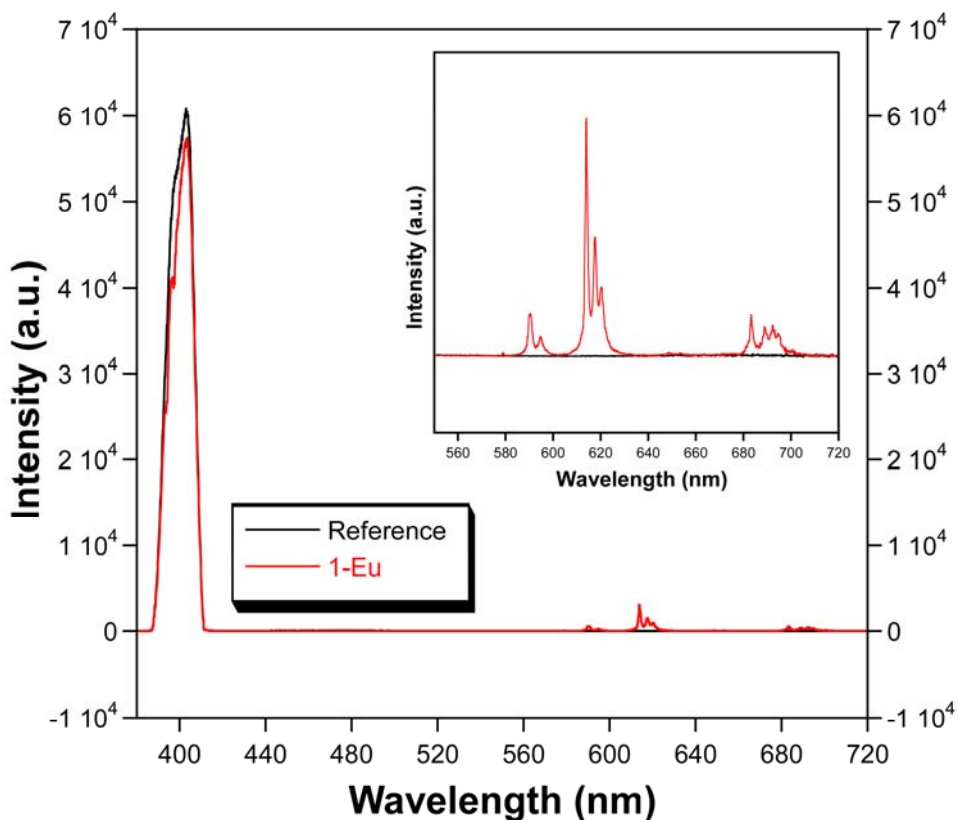

Figure S24. Determination of the quantum yield of compound **1-Eu** at room temperature.

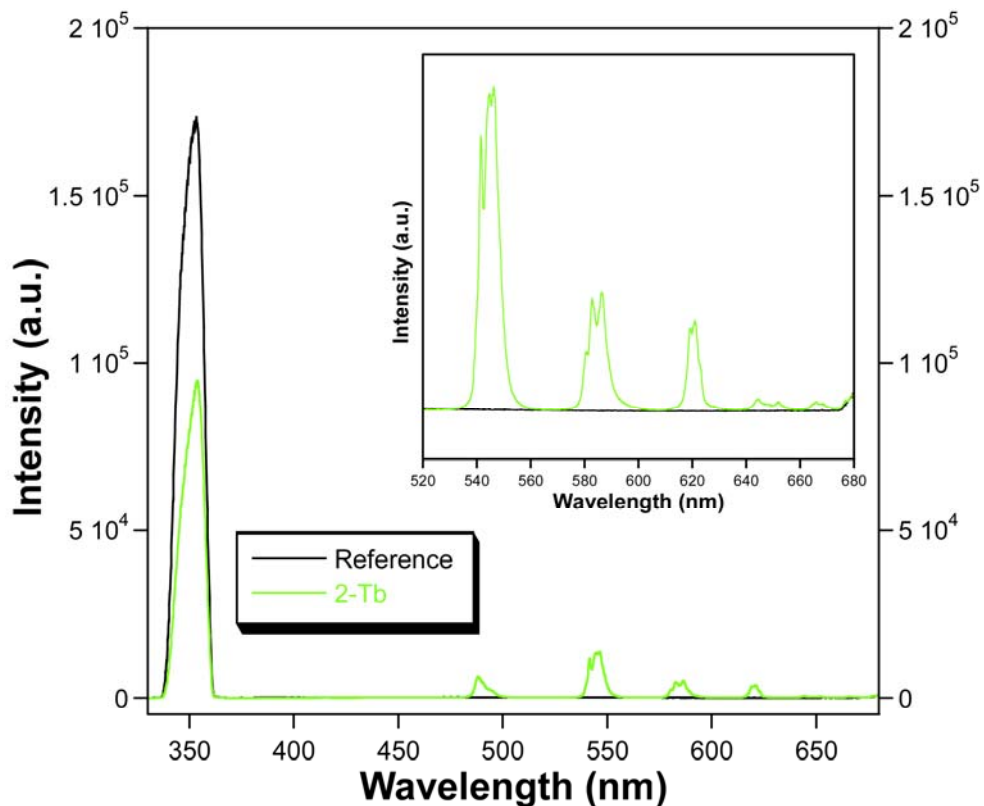

Figure S25. Determination of the quantum yield of compound **2-Tb** at room temperature.

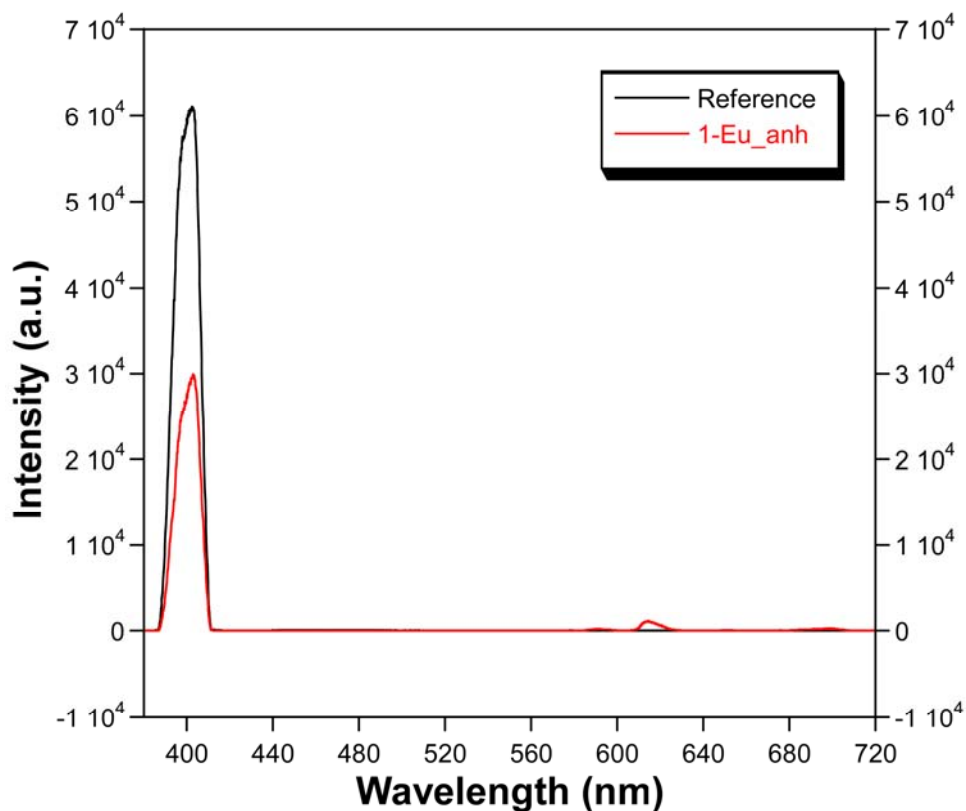

Figure S26. Determination of the quantum yield of compound **1-Eu\_anh** at room temperature.

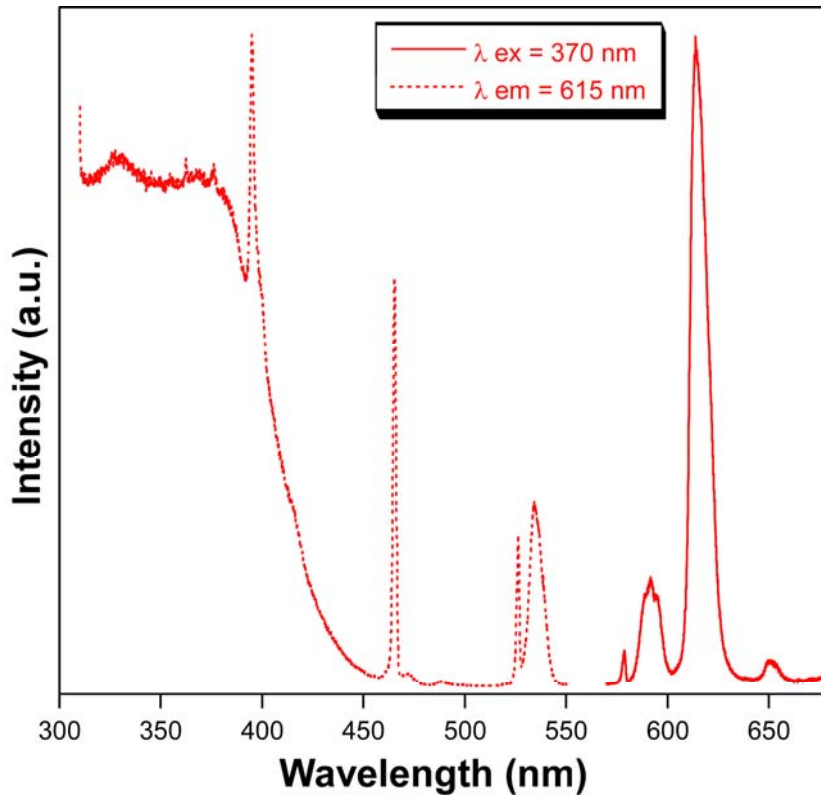

Figure S27. Excitation and emission spectra of **1-Eu\_anh** compound at room temperature.



**Table S8.** Thermal evolution of the visible emission lifetime values of **1-Ln** and **2-Ln** compounds.

| Temp. (K) | <i>1-Sm</i>                       |                                   | <i>1-Eu</i>       | <i>2-Tb</i>       | <i>2-Dy</i> |
|-----------|-----------------------------------|-----------------------------------|-------------------|-------------------|-------------|
|           | $\tau_1$ ( $\mu$ s) / <i>Rel.</i> | $\tau_2$ ( $\mu$ s) / <i>Rel.</i> | $\tau$ ( $\mu$ s) | $\tau$ ( $\mu$ s) | $\tau$ (ns) |
| 10        | 1.38(1) / 91.5                    | 12.2(6) / 8.5                     | 538(2)            | 985(6)            | 3330(9)     |
| 50        | 1.38(1) / 92.5                    | 13.7(7) / 7.5                     | 535(2)            | 994(6)            | 3214(12)    |
| 100       | 1.43(1) / 91.1                    | 12.2(5) / 8.9                     | 493(2)            | 983(6)            | 3074(9)     |
| 150       | 1.62(1) / 91.0                    | 13.1(6) / 8.0                     | 454(2)            | 984(6)            | 2983(9)     |
| 200       | 1.75(1) / 91.7                    | 12.6(6) / 8.3                     | 421(2)            | 1019(5)           | 2863(9)     |
| 250       | 1.84(1) / 92.8                    | 13.4(6) / 7.2                     | 405(2)            | 1015(5)           | 2791(9)     |
| 300       | 1.84(1) / 92.2                    | 12.8(6) / 7.8                     | 400(2)            | 1022(5)           | 2700(9)     |

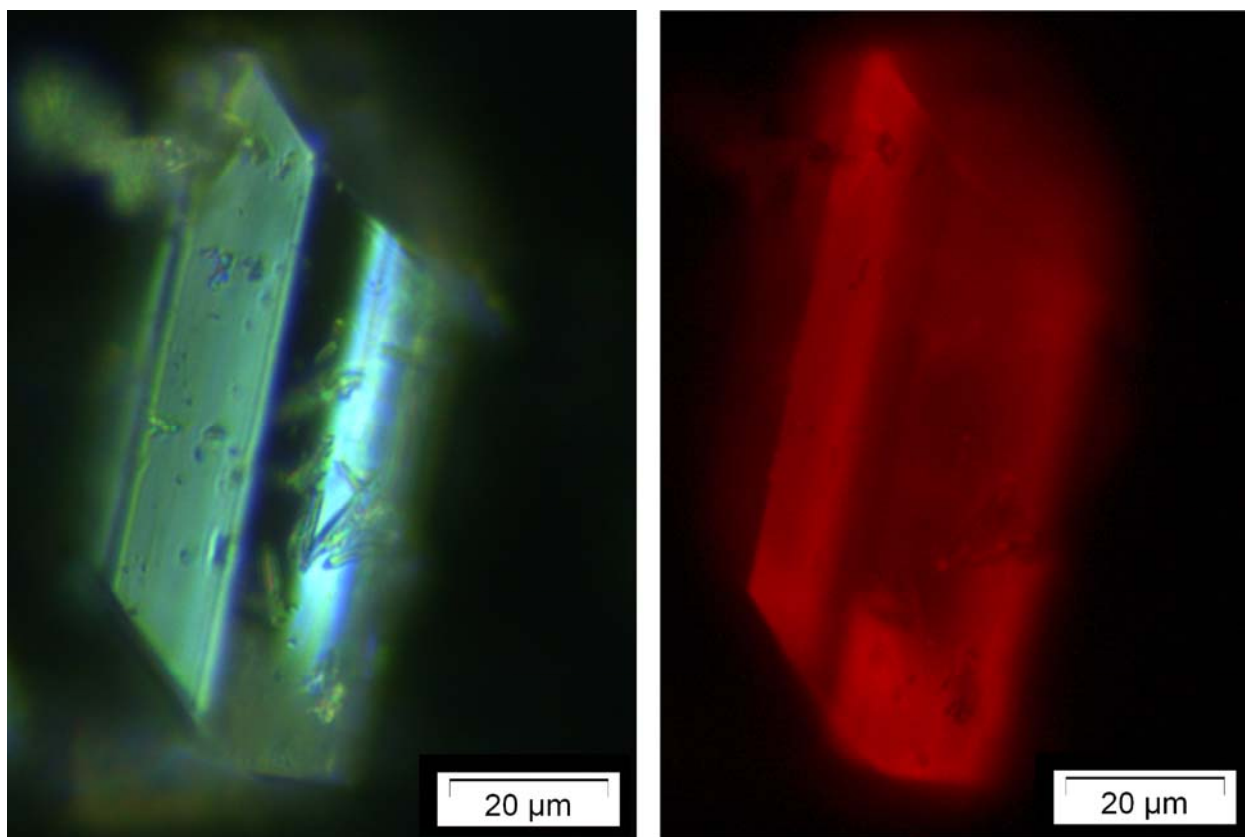

**Figure S28.** Optical (left) and photo-luminescence (right) images of single crystals of **1-Eu**.

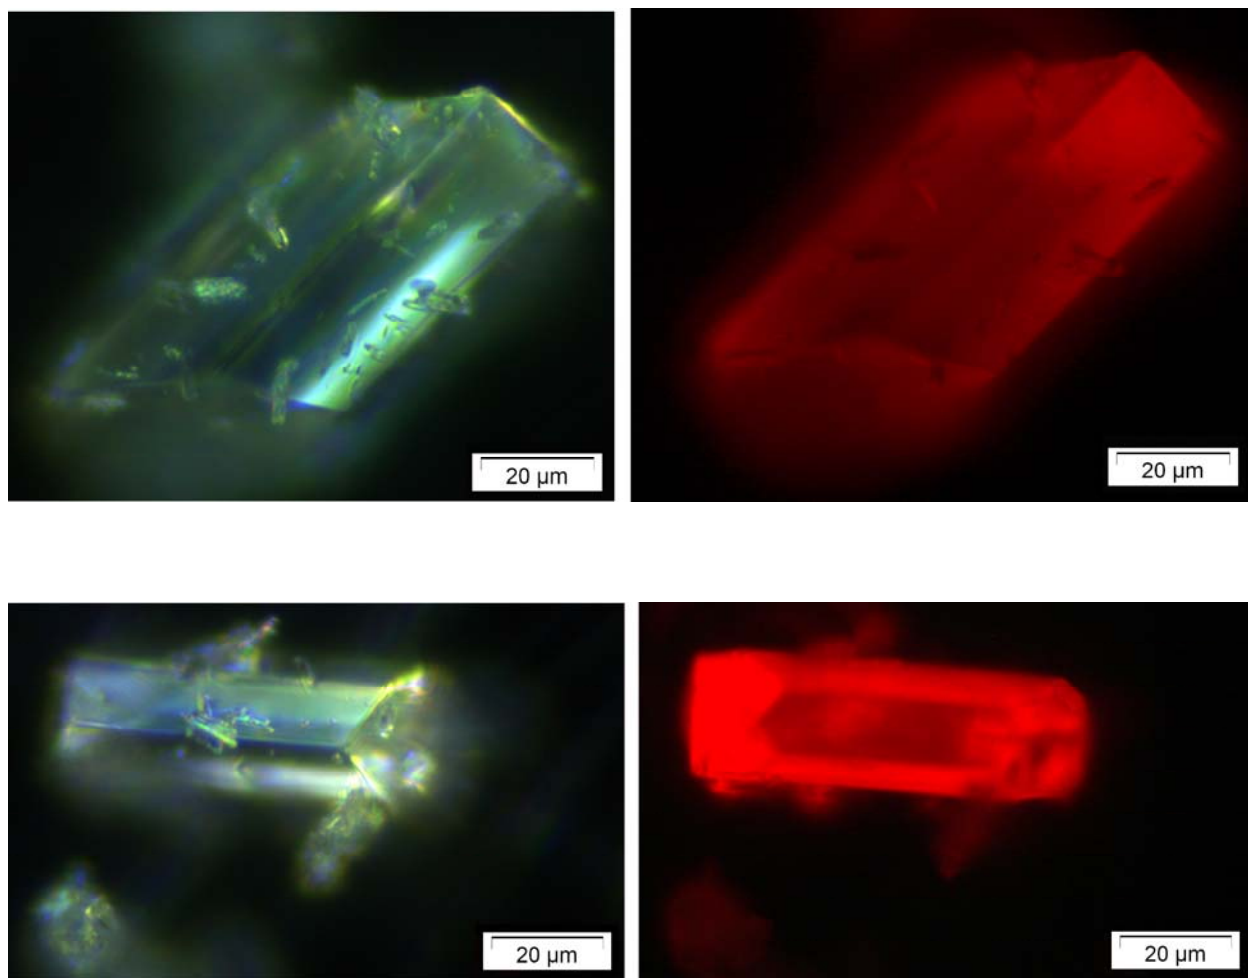

**Figure S29.** Optical (left) and photo-luminescence (right) images of single crystals of **1-Eu** (cont.).

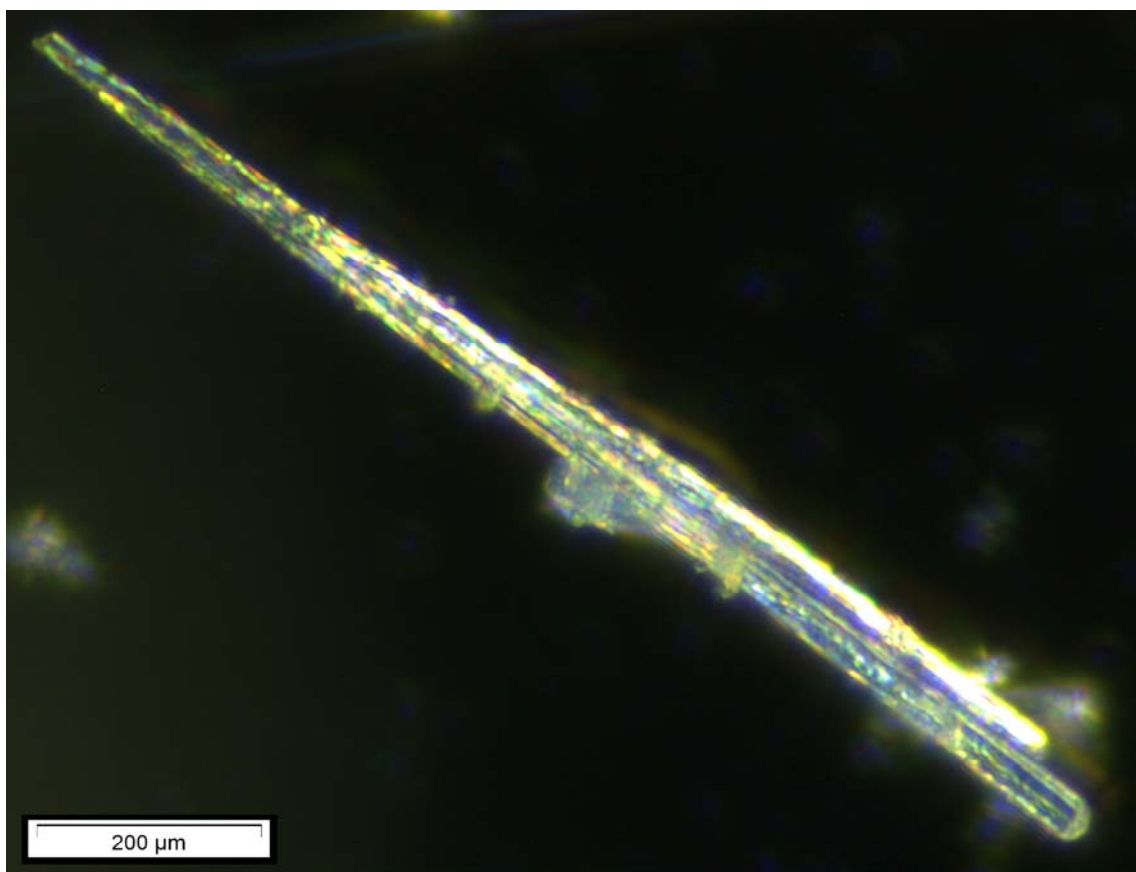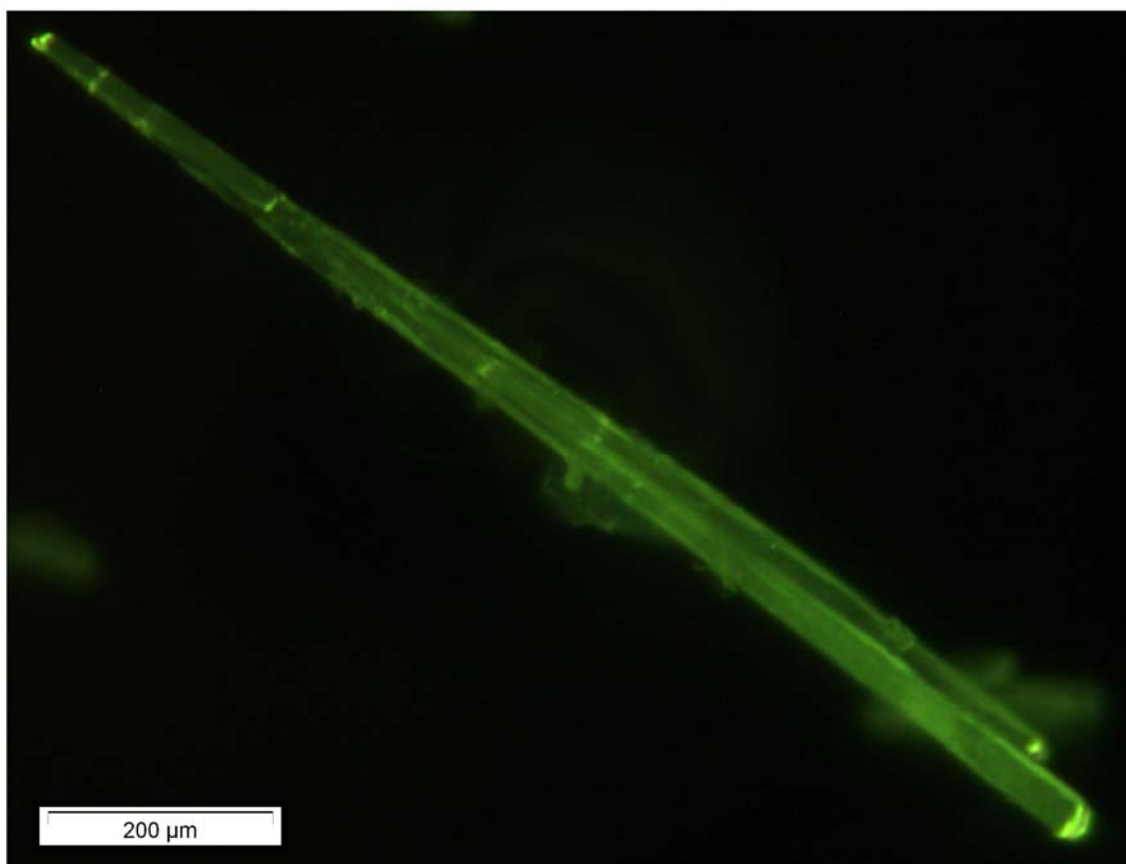

**Figure S30.** Optical (left) and photo-luminescence (right) images of crystalline agglomerates of 2-Tb.

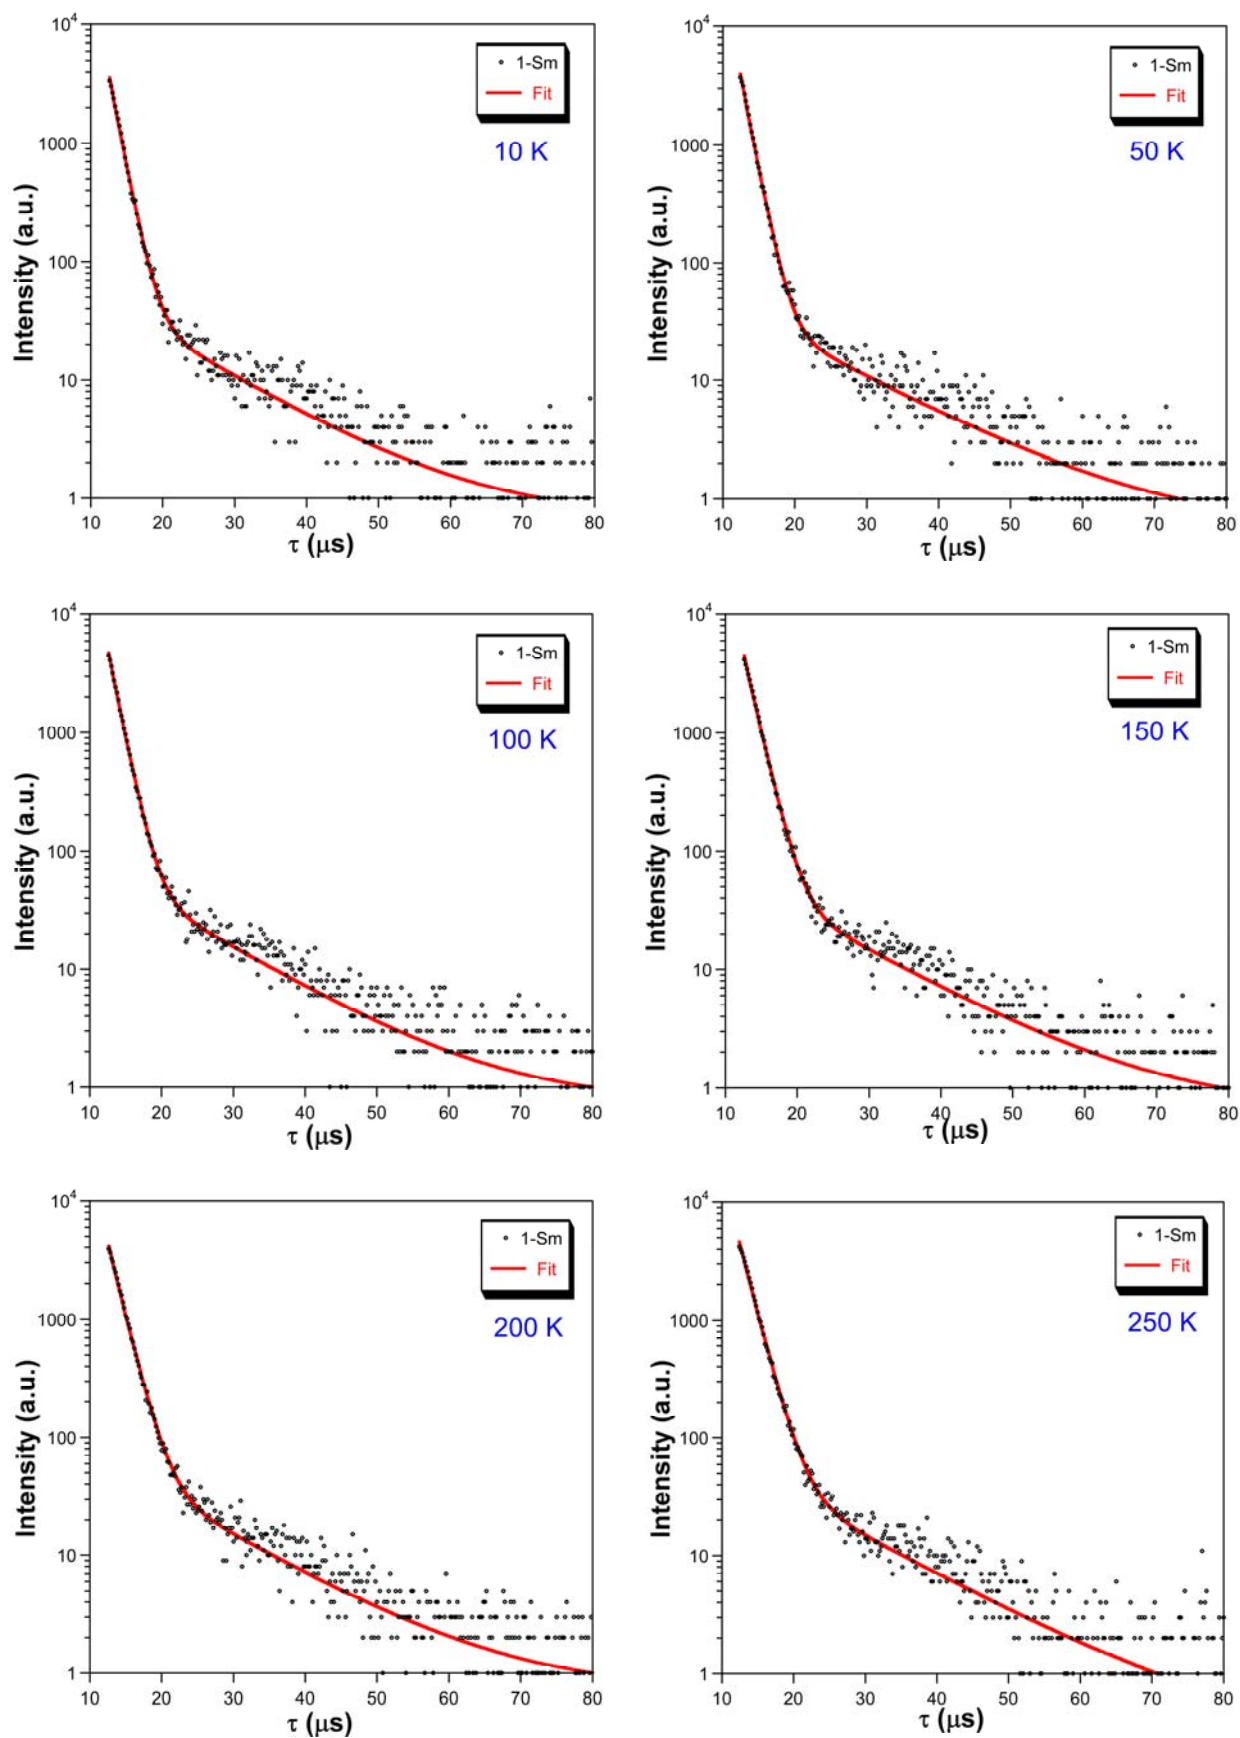

**Figure S31.** Luminescence decay lifetime fits of 1-Sm monitored at  ${}^4G_{5/2} \rightarrow {}^6H_{7/2}$  transition.

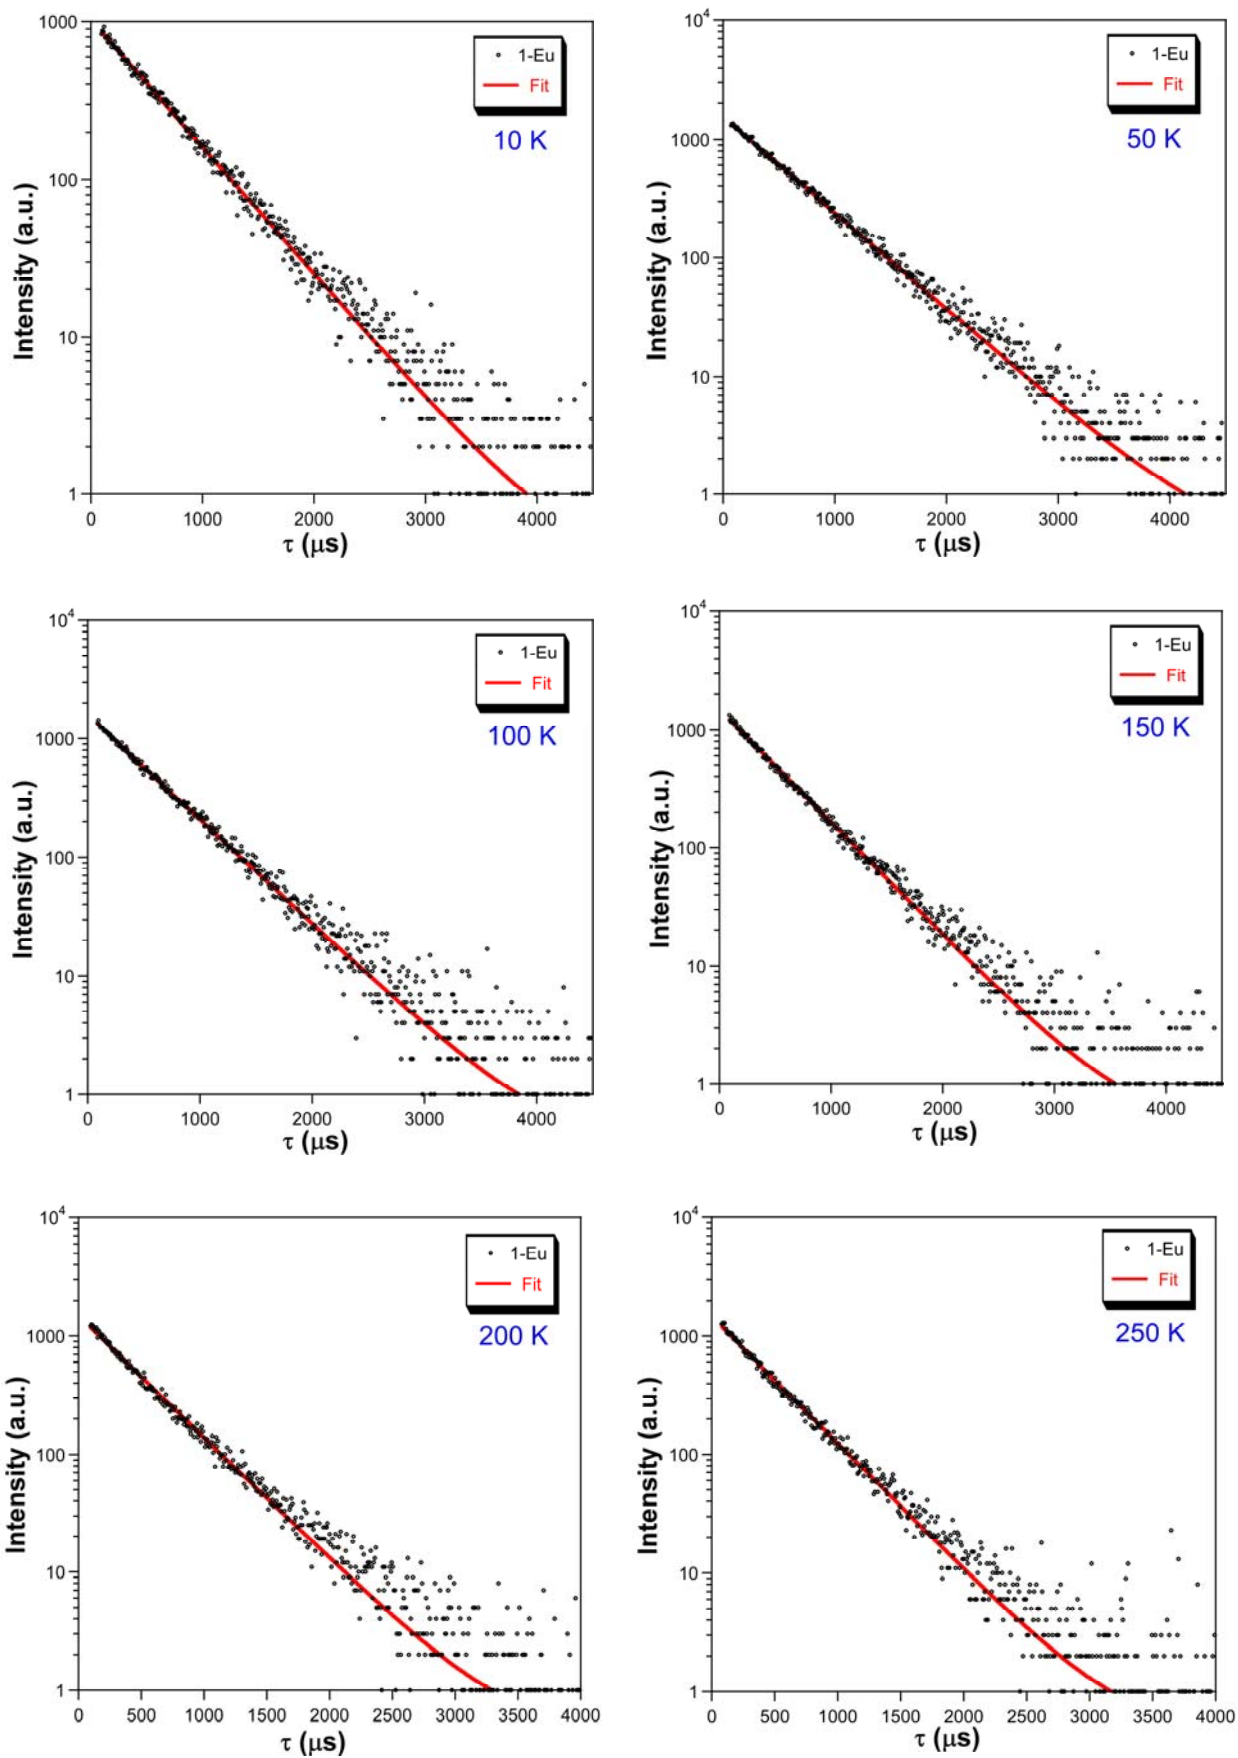

Figure S32. Luminescence decay lifetime fits of 1-Eu monitored at  $^5D_0 \rightarrow ^7F_2$  transition.

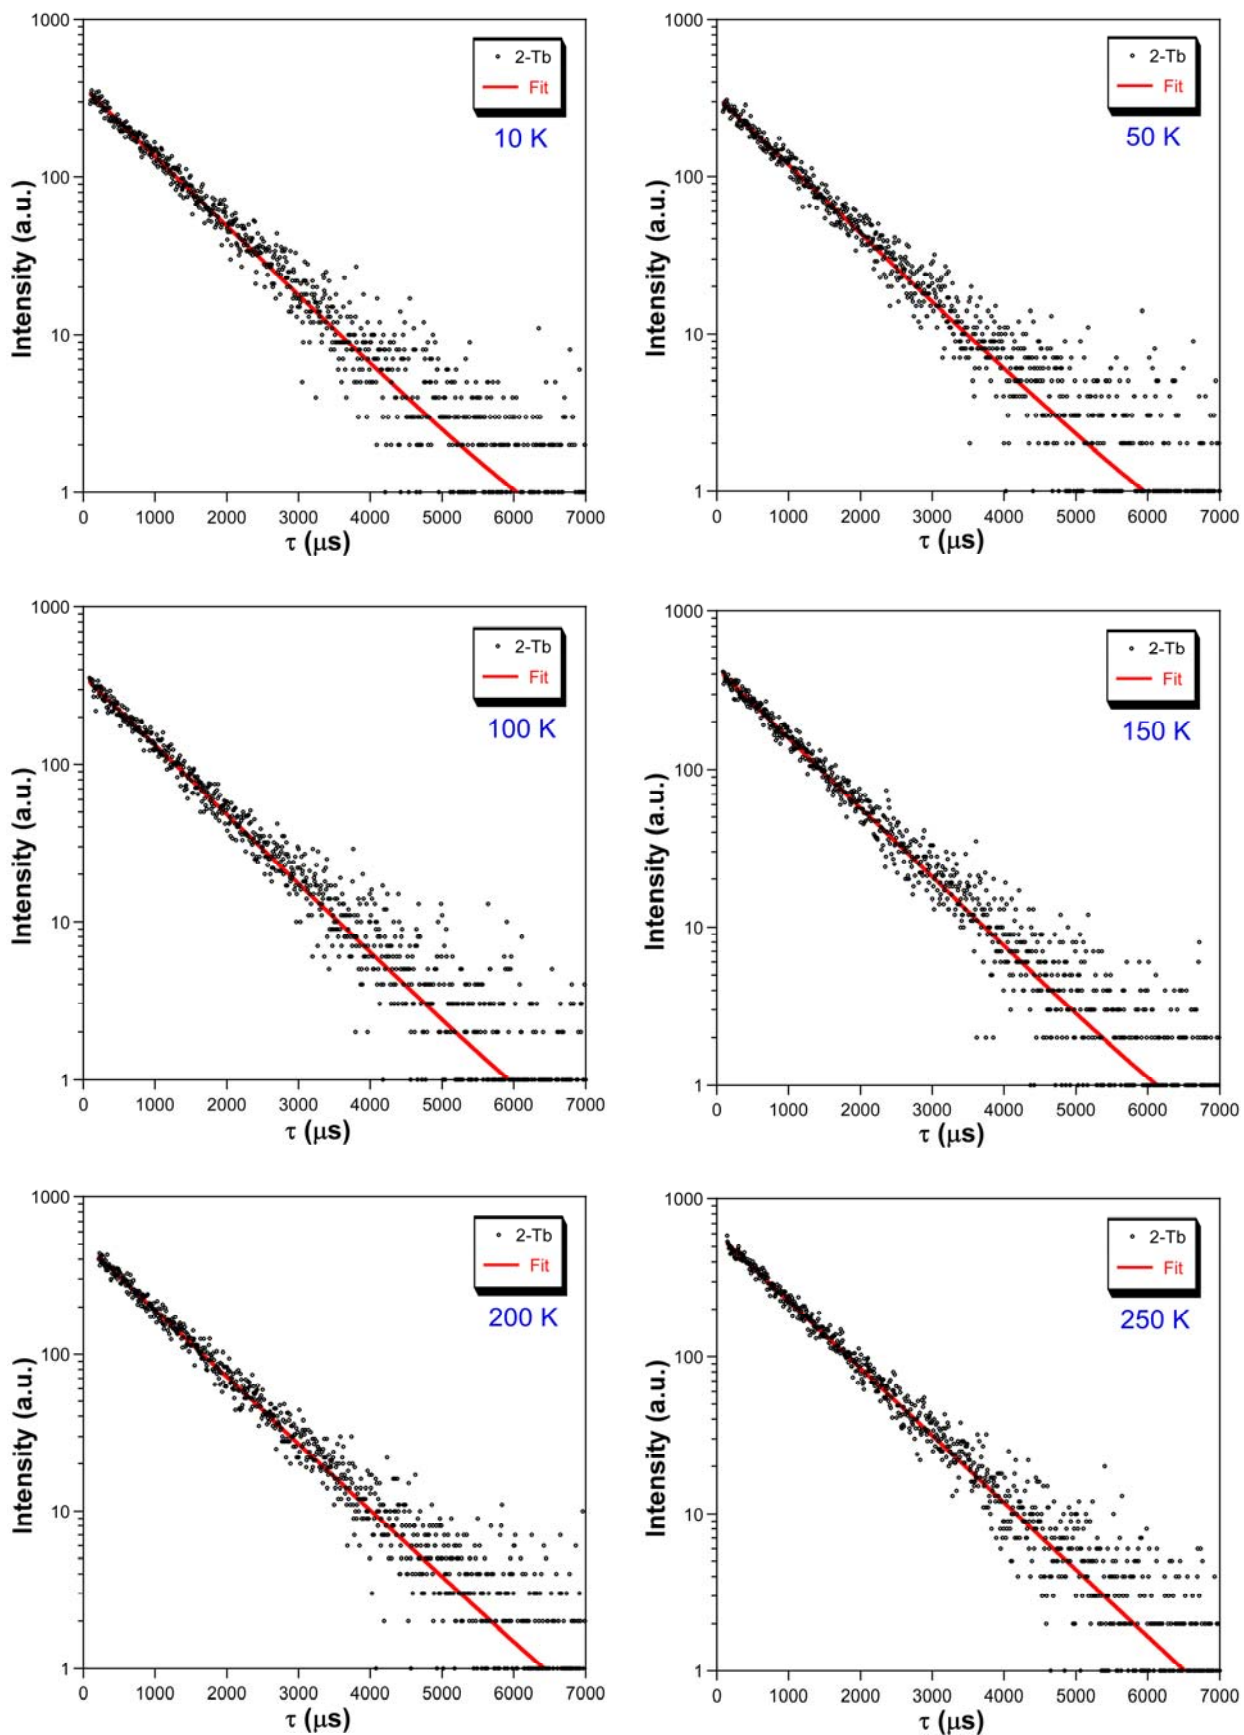

**Figure S33.** Luminescence decay lifetime fits of 2-Tb monitored at  ${}^5D_4 \rightarrow {}^7F_5$  transition.

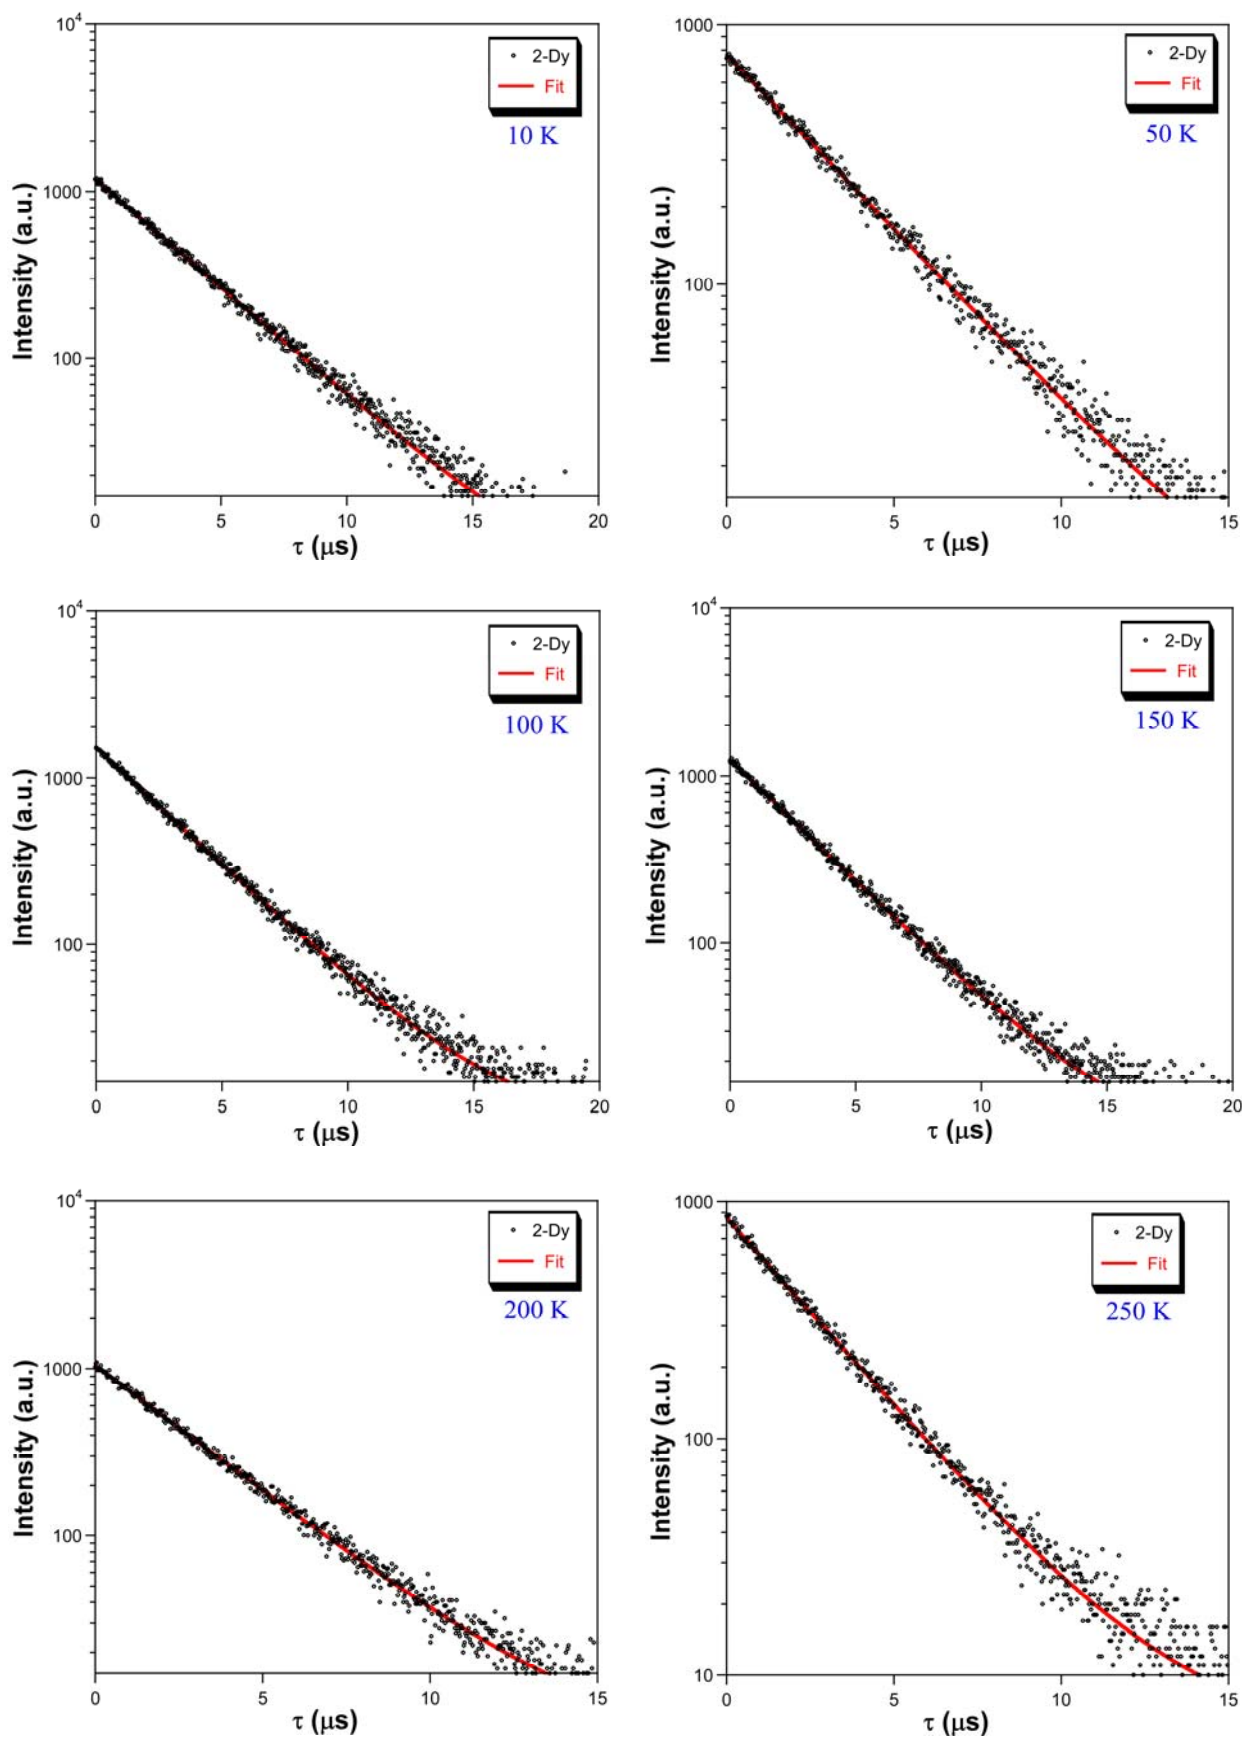

**Figure S34.** Luminescence decay lifetime fits of 2-Dy monitored at  ${}^4\text{F}_{9/2} \rightarrow {}^6\text{H}_{15/2}$  transition.

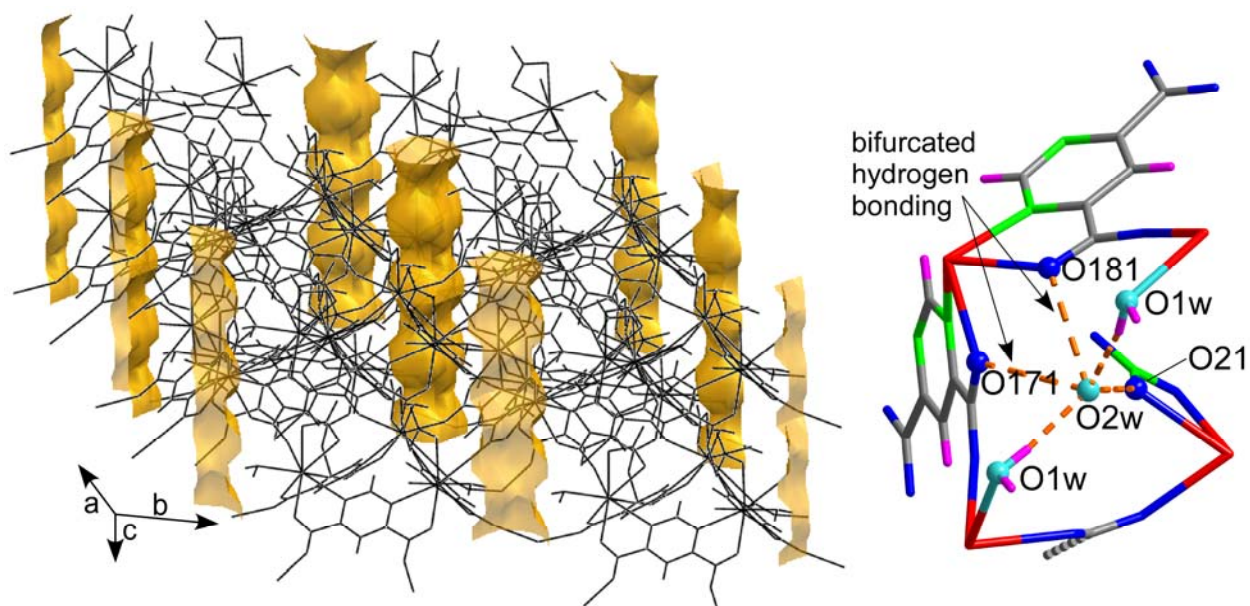

**Figure S35.** Channels of the **2-Gd** compound with hydrogen bonding interactions.

**Table S9.** Hydrogen bonding interactions ( $\text{\AA}$ ,  $^\circ$ ) of **1-La** compound.<sup>[a]</sup>

| $D-H\cdots A^{[b]}$    | $D-H$ | $H\cdots A$ | $D\cdots A$ | $D-H\cdots A$ |
|------------------------|-------|-------------|-------------|---------------|
| O1w-H11w $\cdots$ O23d | 0.85  | 2.04        | 2.884(3)    | 169.5         |
| O1w-H12w $\cdots$ O24e | 0.86  | 2.08        | 2.922(3)    | 169.7         |

[a] Symmetry codes: (d)  $-x + 1/2, y + 1/2, -z + 3/2$ ; (e)  $x + 1/2, -y + 3/2, z + 1/2$ . [b] D: donor. A: acceptor.

**Table S10.** Hydrogen bonding interactions ( $\text{\AA}$ ,  $^\circ$ ) of **2-Gd** compound.<sup>[a]</sup>

| $D-H\cdots A^{[b]}$     | $D-H$ | $H\cdots A$ | $D\cdots A$ | $D-H\cdots A$ |
|-------------------------|-------|-------------|-------------|---------------|
| O1w-H11w $\cdots$ O2w   | 0.86  | 1.90        | 2.749(4)    | 169.6         |
| O1w-H12w $\cdots$ O2wd  | 0.86  | 1.90        | 2.752(4)    | 171.5         |
| O2w-H21w $\cdots$ O213e | 0.90  | 2.07        | 2.916(4)    | 157.1         |
| O2w-H21w $\cdots$ O171f | 0.94  | 2.23        | 3.034(5)    | 142.0         |
| O2w-H22w $\cdots$ O181c | 0.94  | 2.23        | 3.034(5)    | 142.4         |

[a] Symmetry codes: (d)  $-y, x - y, z$ ; (e)  $y, -x + y, z + 1/2$ ; (f)  $y, -x + y, z - 1/2$ . [b] D: donor. A: acceptor.



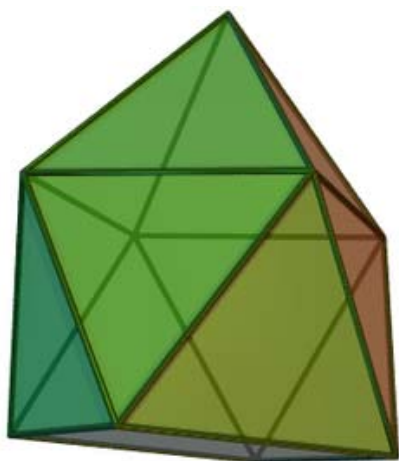

JGSP / Johnson gyroelongated square pyramid

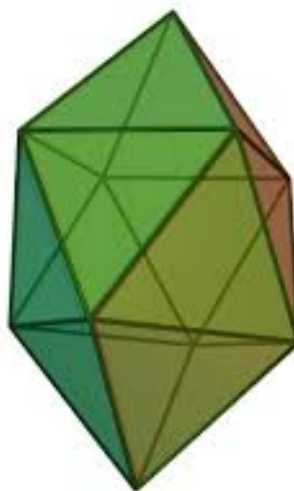

JGSB / Johnson gyroelongated square bipyramid

**Figure S36.** Ideal shapes with nine vertices (abbreviation / full name).
